# Supplementary material
Source: PubMed Central journal article supplement (PMC4255479)
Supplement: NIHMS60851-supplement-Supplementary_table_1.pdf [file NIHMS60851-supplement-Supplementary_table_1.pdf]

## NEBRASKA LIBRARY

| NARSA Barcode | Gene name | Gene description                       | Accession number | Whole genome insertion site | Transposon orientation |
|---------------|-----------|----------------------------------------|------------------|-----------------------------|------------------------|
| 0100338044    | purB      | adenylosuccinate lyase                 | SAUSA300_1889    | 2053923                     | Minus                  |
| 0100383786    | pyrP      | uracil permease                        | SAUSA300_1092    | 1194618                     | Minus                  |
| 0120005773    | -         | acetyl-CoA<br>acetyltransferase        | SAUSA300_0355    | 406450                      | Minus                  |
| 0100383997    | lpdA      | dihydrolipoamide<br>dehydrogenase      | SAUSA300_0996    | 1092643                     | Plus                   |
| 0100383959    | -         | hypothetical protein                   | SAUSA300_0980    | 1074897                     | Plus                   |
| 0120005719    | mecA      | penicillin-binding protein<br>2'       | SAUSA300_0032    | 40707                       | Minus                  |
| 0100335082    |           | putative membrane<br>protein           | SAUSA300_0694    | 770011                      | Plus                   |
| 0120005527    | -         | hypothetical protein                   | SAUSA300_0442    | 495091                      | Minus                  |
| 0100338038    | purA      | adenylosuccinate<br>synthetase         | SAUSA300_0017    | 22754                       | Minus                  |
| 0120005472    | -         | hypothetical protein                   | SAUSA300_1720    | 1903757                     | Minus                  |
| 0100386884    |           | UDP-N-acetylglucosamine<br>2-epimerase | SAUSA300_2065    | 2228285                     | Minus                  |
| 0100382941    |           | conserved hypothetical<br>protein      | SAUSA300_1734    | 1919127                     | Minus                  |
| 100384945     | -         |                                        | SAUSA300_1796    | 1979943                     | Plus                   |
| 100382938     |           |                                        | SAUSA300_0121    | 138435                      | Plus                   |
| 100383617     | -         |                                        | SAUSA300_1322    | 1454222                     | Minus                  |
| 120005520     | -         |                                        | SAUSA300_0393    | 445043                      | Plus                   |
| 100384807     |           |                                        | SAUSA300_1210    | 1330817                     | Plus                   |
| 100338020     |           |                                        | SAUSA300_0564    | 639056                      | Minus                  |
| 100363004     |           |                                        | SAUSA300_0039    | 50579                       | Plus                   |
| 100335098     | recF      |                                        | SAUSA300_0004    | 3977                        | Minus                  |
| 100363000     |           |                                        | SAUSA300_2343    | 2519661                     | Minus                  |
| 100362994     |           |                                        | SAUSA300_1584    | 1733739                     | Plus                   |
| 120005536     | -         |                                        | SAUSA300_1583    | 1733227                     | Minus                  |
| 100384461     | -         |                                        | SAUSA300_0505    | 564678                      | Plus                   |
| 100383832     | -         |                                        | SAUSA300_1229    | 1346966                     | Plus                   |
| 100361701     | ilvA      |                                        | SAUSA300_2014    | 2174480                     | Plus                   |
| 100361692     |           |                                        | SAUSA300_2103    | 2269723                     | Minus                  |
| 100362923     |           |                                        | SAUSA300_0595    | 668879                      | Minus                  |
| 100385179     | sdrD      |                                        | SAUSA300_0547    | 614916                      | Plus                   |
| 100363014     |           |                                        | SAUSA300_0170    | 192430                      | Plus                   |
| 100362916     |           |                                        | SAUSA300_0073    | 80584                       | Plus                   |
| 100362893     |           |                                        | SAUSA300_1503    | 1656063                     | Minus                  |
| 100362988     |           |                                        | SAUSA300_0662    | 737914                      | Minus                  |
| 100384656     | -         |                                        | SAUSA300_0255    | 307908                      | Minus                  |
| 100385185     | rrlA      |                                        | SAUSA300_0456    | 515424                      | Plus                   |
| 100362892     |           |                                        | SAUSA300_0482    | 541554                      | Plus                   |
| 100362899     |           |                                        | SAUSA300_1932    | 2101839                     | Plus                   |
| 100362269     |           |                                        | SAUSA300_0784    | 871980                      | Minus                  |
| 100363028     |           |                                        | SAUSA300_1491    | 1645935                     | Plus                   |
| 100362898     | epiE      |                                        | SAUSA300_1761    | 1946929                     | Plus                   |
| 100384944     | -         |                                        | SAUSA300_1722    | 1904625                     | Plus                   |
| 0100385186    | saeS      | sensor histidine kinase<br>SaeS        | SAUSA300_0690    | 767159                      | Plus                   |
| 120005544     | -         |                                        | SAUSA300_0332    | 384679                      | Minus                  |
| 100383965     | -         |                                        | SAUSA300_0136    | 155411                      | Plus                   |
| 100362833     |           |                                        | SAUSA300_2173    | 2354229                     | Plus                   |
| 100362249     |           |                                        | SAUSA300_0215    | 254738                      | Plus                   |
| 100362250     |           |                                        | SAUSA300_0643    | 717815                      | Plus                   |
| 100384770     |           |                                        | SAUSA300_1413    | 1578555                     | Minus                  |
| 100362993     | hfq       |                                        | SAUSA300_1196    | 1318676                     | Plus                   |
| 100362901     | dprA      |                                        | SAUSA300_1142    | 1251740                     | Plus                   |
| 100362170     |           |                                        | SAUSA300_0294    | 347242                      | Minus                  |
| 100362904     |           |                                        | SAUSA300_1071    | 1170310                     | Plus                   |
| 100362924     |           |                                        | SAUSA300_0579    | 652757                      | Plus                   |
| 100362918     |           |                                        | SAUSA300_0340    | 393296                      | Plus                   |
| 100386882     |           |                                        | SAUSA300_1430    | 1586828                     | Plus                   |
| 100362983     |           |                                        | SAUSA300_0107    | 120517                      | Minus                  |
| 100384813     |           |                                        | SAUSA300_2376    | 2556060                     | Minus                  |
| 0100385166    | dat       | D-alanine<br>aminotransferase          | SAUSA300_1696    | 1870942                     | Minus                  |

|            |       |                                     |               |         |           |
|------------|-------|-------------------------------------|---------------|---------|-----------|
| 100384240  | opuCb |                                     | SAUSA300_2392 | 2575844 | Minus     |
| 100362902  |       |                                     | SAUSA300_0674 | 748173  | Minus     |
| 100383649  | leuA  |                                     | SAUSA300_2010 | 2169900 | Minus     |
| 100387031  |       |                                     | SAUSA300_0137 | 156535  | sense     |
| 100382935  |       |                                     | SAUSA300_2287 | 2460200 | Plus      |
| 100384660  | -     |                                     | SAUSA300_1042 | 1138315 | Minus     |
| 100382950  | truB  |                                     | SAUSA300_1164 | 1279427 | Minus     |
| 100362874  |       |                                     | SAUSA300_0720 | 800179  | Minus     |
| 100384795  | epiG  |                                     | SAUSA300_1760 | 1946932 | Plus      |
| 100362925  |       |                                     | SAUSA300_0218 | 258602  | Plus      |
| 100362915  |       |                                     | SAUSA300_2357 | 2534698 | Minus     |
| 100384971  | uvrC  |                                     | SAUSA300_1045 | 1142970 | Plus      |
| 100362105  |       |                                     | SAUSA300_1780 | 1962367 | Minus     |
| 100361698  |       |                                     | SAUSA300_0503 | 563101  | Minus     |
| 100362138  |       |                                     | SAUSA300_2431 | 2616904 | Plus      |
| 100362989  |       |                                     | SAUSA300_1346 | 1513117 | Minus     |
| 100382562  |       |                                     | SAUSA300_1912 | 2078124 | Minus     |
| 100333147  |       |                                     | SAUSA300_0168 | 191105  | Plus      |
| 100361697  |       |                                     | SAUSA300_2515 | 2718469 | Minus     |
| 100384633  | -     |                                     | SAUSA300_1383 | 1549010 | Plus      |
| 100385150  | rimI  |                                     | SAUSA300_2003 | 2163143 | Minus     |
| 100362895  |       |                                     | SAUSA300_2626 | 2852087 | Plus      |
| 100386863  |       |                                     | SAUSA300_2353 | 2530505 | Minus     |
| 100385169  | -     |                                     | SAUSA300_0083 | 92698   | Plus      |
| 100362917  | amt   |                                     | SAUSA300_1996 | 2154912 | Plus      |
| 120005473  | -     |                                     | SAUSA300_1248 | 1370734 | Minus     |
| 100362987  | ftsK  |                                     | SAUSA300_1169 | 1286992 | Plus      |
| 100385146  | -     |                                     | SAUSA300_1198 | 1319962 | Plus      |
| 0100336988 |       | conserved hypothetical protein      | SAUSA300_1019 | 1116732 | Plus      |
| 100386925  |       |                                     | SAUSA300_0728 | 808833  | sense     |
| 120005855  | -     |                                     | SAUSA300_1953 | 2113427 | Minus     |
| 100331526  | int   |                                     | SAUSA300_0799 | 882811  | Minus     |
| 100338037  |       |                                     | SAUSA300_2248 | 2414391 | Plus      |
| 100386892  |       |                                     | SAUSA300_1585 | 1735287 | Minus     |
| 100384467  | lpl3  |                                     | SAUSA300_0415 | 468035  | Plus      |
| 120005541  | -     |                                     | SAUSA300_1378 | 1544386 | Minus     |
| 100384208  | vraS  |                                     | SAUSA300_1866 | 2027203 | Plus      |
| 100336978  | cap5B |                                     | SAUSA300_0153 | 174846  | Plus      |
| 100333146  |       |                                     | SAUSA300_1805 | 1988283 | Plus      |
| 100384688  | -     |                                     | SAUSA300_0451 | 508890  | Plus      |
| 100386905  |       |                                     | SAUSA300_0713 | 791880  | antisense |
| 120005517  | tpx   |                                     | SAUSA300_1659 | 1825087 | Minus     |
| 100382543  | corA  |                                     | SAUSA300_2293 | 2466467 | Minus     |
| 100362259  |       |                                     | SAUSA300_1500 | 1653959 | Plus      |
| 0100383976 | saeR  | DNA-binding response regulator SaeR | SAUSA300_0691 | 767648  | Minus     |
| 100338011  |       |                                     | SAUSA300_2510 | 2715699 | Plus      |
| 100386860  | cyoE  |                                     | SAUSA300_1016 | 1114323 | Plus      |
| 100362909  |       |                                     | SAUSA300_0847 | 926564  | Minus     |
| 100362927  |       |                                     | SAUSA300_0732 | 813073  | Minus     |
| 100362854  |       |                                     | SAUSA300_2130 | 2304628 | Plus      |
| 100383609  | purS  |                                     | SAUSA300_0969 | 1061766 | Plus      |
| 100382594  |       |                                     | SAUSA300_0100 | 110456  | Plus      |
| 100383618  | -     |                                     | SAUSA300_1387 | 1551153 | Minus     |
| 100363015  |       |                                     | SAUSA300_0748 | 835162  | Plus      |
| 100386876  |       |                                     | SAUSA300_0631 | 705810  | Minus     |
| 100362836  |       |                                     | SAUSA300_2114 | 2290057 | Plus      |
| 0100331524 |       | conserved hypothetical protein      | SAUSA300_2297 | 2468968 | Minus     |
| 100384611  | -     |                                     | SAUSA300_1291 | 1422317 | Minus     |
| 100362103  | tagX  |                                     | SAUSA300_0627 | 699849  | Minus     |
| 100384213  | -     |                                     | SAUSA300_0176 | 198081  | Plus      |
| 100385301  | -     |                                     | SAUSA300_0489 | 547698  | Plus      |
| 100337686  |       |                                     | SAUSA300_0238 | 287793  | Minus     |
| 100382960  |       |                                     | SAUSA300_2464 | 2661236 | Minus     |
| 100386877  |       |                                     | SAUSA300_2627 | 2853366 | Minus     |
| 100383810  | -     |                                     | SAUSA300_1404 | 1571623 | Plus      |
| 100386887  |       |                                     | SAUSA300_1180 | 1299577 | Minus     |
| 120005540  | lacB  |                                     | SAUSA300_2154 | 2331964 | Minus     |
| 100385196  | -     |                                     | SAUSA300_1304 | 1435275 | Plus      |

|            |        |                                                  |               |         |           |
|------------|--------|--------------------------------------------------|---------------|---------|-----------|
| 100383774  | -      |                                                  | SAUSA300_1254 | 1379789 | Plus      |
| 100362950  |        |                                                  | SAUSA300_1059 | 1159427 | Plus      |
| 100337700  |        |                                                  | SAUSA300_1733 | 1918716 | Minus     |
| 100337680  |        |                                                  | SAUSA300_2406 | 2592333 | Minus     |
| 100362863  | tcaA   |                                                  | SAUSA300_2302 | 2475758 | Plus      |
| 100386904  |        |                                                  | SAUSA300_0594 | 667864  | antisense |
| 100382559  |        |                                                  | SAUSA300_0028 | 36543   | Minus     |
| 0100383851 | -      | hypothetical protein                             | SAUSA300_0383 | 434439  | Minus     |
| 100337699  |        |                                                  | SAUSA300_0309 | 359733  | Plus      |
| 100337682  | moaD   |                                                  | SAUSA300_2221 | 2391108 | Plus      |
| 100338017  | clfA   |                                                  | SAUSA300_0772 | 859218  | Minus     |
| 100383847  | -      |                                                  | SAUSA300_0241 | 290780  | Minus     |
| 100363005  | rexA   |                                                  | SAUSA300_0870 | 952792  | Minus     |
| 0100331483 | atl    | autolysin                                        | SAUSA300_0955 | 1046792 | Minus     |
| 100362897  |        |                                                  | SAUSA300_1970 | 2124014 | Minus     |
| 100384492  | opp-3B |                                                  | SAUSA300_0074 | 82421   | Plus      |
| 100385163  | ureD   |                                                  | SAUSA300_2244 | 2409821 | Plus      |
| 100331481  |        |                                                  | SAUSA300_0917 | 1006997 | Minus     |
| 100337683  |        |                                                  | SAUSA300_1705 | 1888866 | Minus     |
| 100384561  | -      |                                                  | SAUSA300_1695 | 1869295 | Minus     |
| 100335066  |        |                                                  | SAUSA300_2509 | 2715009 | Minus     |
| 100337695  |        |                                                  | SAUSA300_1481 | 1635537 | Plus      |
| 100362883  |        |                                                  | SAUSA300_1623 | 1778382 | Plus      |
| 100383573  | -      |                                                  | SAUSA300_0613 | 685371  | Minus     |
| 0120005767 |        | protein phosphatase 2C domain-containing protein | SAUSA300_1112 | 1217975 | Plus      |
| 120005504  | -      |                                                  | SAUSA300_1692 | 1866582 | Plus      |
| 100382565  |        |                                                  | SAUSA300_0797 | 880411  | Minus     |
| 100383835  | -      |                                                  | SAUSA300_0258 | 310545  | Plus      |
| 100362104  |        |                                                  | SAUSA300_2466 | 2662535 | Plus      |
| 100333167  |        |                                                  | SAUSA300_1668 | 1833093 | Plus      |
| 100383812  | -      |                                                  | SAUSA300_1298 | 1427036 | Minus     |
| 100337685  |        |                                                  | SAUSA300_0369 | 420844  | Plus      |
| 100382926  |        |                                                  | SAUSA300_1432 | 1587242 | Minus     |
| 100383790  | -      |                                                  | SAUSA300_1275 | 1403716 | Plus      |
| 100335076  | polA   |                                                  | SAUSA300_1636 | 1793252 | Plus      |
| 100331518  | moaE   |                                                  | SAUSA300_2222 | 2391531 | Plus      |
| 100383574  | -      |                                                  | SAUSA300_2402 | 2587370 | Minus     |
| 100337687  | upp    |                                                  | SAUSA300_2066 | 2229311 | Minus     |
| 100384123  |        |                                                  | SAUSA300_0146 | 165112  | Plus      |
| 100362881  |        |                                                  | SAUSA300_0876 | 960861  | Plus      |
| 100363019  |        |                                                  | SAUSA300_1858 | 2019930 | Plus      |
| 100337684  |        |                                                  | SAUSA300_1851 | 2014386 | Minus     |
| 100333129  |        |                                                  | SAUSA300_1939 | 2106324 | Plus      |
| 100337678  |        |                                                  | SAUSA300_1905 | 2072214 | Plus      |
| 100384985  | -      |                                                  | SAUSA300_2332 | 2507921 | Plus      |
| 100384649  | -      |                                                  | SAUSA300_1613 | 1767176 | Minus     |
| 100384670  | -      |                                                  | SAUSA300_1993 | 2150812 | Plus      |
| 100338006  |        |                                                  | SAUSA300_2494 | 2697175 | Plus      |
| 100386913  |        |                                                  | SAUSA300_1305 | 1436724 | antisense |
| 100362922  |        |                                                  | SAUSA300_0046 | 57098   | Plus      |
| 0100331509 |        | phosphosugar-binding transcriptional regulator   | SAUSA300_2271 | 2441946 | Plus      |
| 100382931  |        |                                                  | SAUSA300_0352 | 402739  | Plus      |
| 100338026  |        |                                                  | SAUSA300_2408 | 2593737 | Plus      |
| 100362834  |        |                                                  | SAUSA300_2644 | 2868359 | Minus     |
| 120005545  | -      |                                                  | SAUSA300_0940 | 1029093 | Minus     |
| 100384774  |        |                                                  | SAUSA300_2595 | 2822639 | Plus      |
| 100384957  | -      |                                                  | SAUSA300_0373 | 424520  | Plus      |
| 0100384126 | -      | hypothetical protein                             | SAUSA300_0856 | 934485  | Minus     |
| 120005518  | aroB   |                                                  | SAUSA300_1356 | 1522958 | Plus      |
| 100383635  | -      |                                                  | SAUSA300_1223 | 1340839 | Minus     |
| 100384199  | -      |                                                  | SAUSA300_2106 | 2274394 | Minus     |
| 100333169  |        |                                                  | SAUSA300_0883 | 970195  | Plus      |
| 100337620  |        |                                                  | SAUSA300_1980 | 2137395 | Minus     |
| 120005491  | recG   |                                                  | SAUSA300_1120 | 1226020 | Plus      |
| 0100338041 |        | peptidase, M20/M25/M40 family                    | SAUSA300_1460 | 1615429 | Minus     |
| 100385181  |        |                                                  | SAUSA300_1955 | 2114321 | Minus     |
| 100362880  | ggt    |                                                  | SAUSA300_0204 | 241402  | Plus      |

|            |       |                                                            |               |         |           |
|------------|-------|------------------------------------------------------------|---------------|---------|-----------|
| 100384546  |       |                                                            | SAUSA300_1797 | 1980454 | Minus     |
| 100383593  | -     |                                                            | SAUSA300_0831 | 911509  | Minus     |
| 100384793  |       |                                                            | SAUSA300_0040 | 51116   | Plus      |
| 100386914  |       |                                                            | SAUSA300_1531 | 1681309 | Minus     |
| 100383802  | -     |                                                            | SAUSA300_0318 | 370013  | Minus     |
| 100384719  | -     |                                                            | SAUSA300_0584 | 657943  | Minus     |
| 100384711  | -     |                                                            | SAUSA300_0903 | 992518  | Minus     |
| 100384056  | empbp |                                                            | SAUSA300_0774 | 864554  | Minus     |
| 100331514  | pdp   |                                                            | SAUSA300_2089 | 2253713 | Minus     |
| 100383606  | -     |                                                            | SAUSA300_2145 | 2322225 | Plus      |
| 100331531  |       |                                                            | SAUSA300_1374 | 1541974 | Minus     |
| 100384979  | -     |                                                            | SAUSA300_2489 | 2692010 | Minus     |
| 100386935  |       |                                                            | SAUSA300_0825 | 905740  | sense     |
| 100384681  | cidB  |                                                            | SAUSA300_2478 | 2677065 | Minus     |
| 100383587  | scpB  |                                                            | SAUSA300_1444 | 1598952 | Minus     |
| 100386866  |       |                                                            | SAUSA300_1487 | 1642223 | Plus      |
| 100337693  |       |                                                            | SAUSA300_2129 | 2303610 | Minus     |
| 100362859  |       |                                                            | SAUSA300_2452 | 2648917 | Plus      |
| 100384071  | nhaC  |                                                            | SAUSA300_2250 | 2417285 | Plus      |
| 100384760  | msrB  |                                                            | SAUSA300_1316 | 1449151 | Plus      |
| 100382581  |       |                                                            | SAUSA300_1978 | 2134672 | Plus      |
| 100384510  | arsB  |                                                            | SAUSA300_1718 | 1901532 | Minus     |
| 100362908  | cap5l |                                                            | SAUSA300_0160 | 182198  | Plus      |
| 120005530  | -     |                                                            | SAUSA300_1238 | 1356227 | Plus      |
| 100384595  | arIR  |                                                            | SAUSA300_1308 | 1441782 | Minus     |
| 100386921  |       |                                                            | SAUSA300_0626 | 700252  | antisense |
| 100384221  | -     |                                                            | SAUSA300_1206 | 1328442 | Minus     |
| 0100384224 | -     | FAD/NAD(P)-binding<br>Rossmann fold<br>superfamily protein | SAUSA300_0394 | 445890  | Minus     |
| 100383840  | -     |                                                            | SAUSA300_0702 | 776005  | Plus      |
| 100363016  |       |                                                            | SAUSA300_1701 | 1876528 | Plus      |
| 100386894  |       |                                                            | SAUSA300_1853 | 2016202 | Minus     |
| 100383666  | -     |                                                            | SAUSA300_0673 | 747079  | Plus      |
| 100338053  | sarT  |                                                            | SAUSA300_2437 | 2626802 | Minus     |
| 100333132  |       |                                                            | SAUSA300_0779 | 868464  | Minus     |
| 100386903  | mgo   |                                                            | SAUSA300_2541 | 2744942 | Plus      |
| 100384497  | rnc   |                                                            | SAUSA300_1126 | 1232122 | Plus      |
| 0100386869 | ltrA  | low temperature<br>requirement protein LtrA                | SAUSA300_0354 | 404970  | Minus     |
| 100386883  |       |                                                            | SAUSA300_0407 | 460921  | Plus      |
| 100386855  |       |                                                            | SAUSA300_2475 | 2671718 | Minus     |
| 0100384092 | -     | ABC transporter ATP-<br>binding protein                    | SAUSA300_2288 | 2460691 | Minus     |
| 100384952  | -     |                                                            | SAUSA300_0430 | 483897  | Minus     |
| 100384464  | -     |                                                            | SAUSA300_0070 | 77459   | Plus      |
| 0100385164 | -     | beta-lactamase                                             | SAUSA300_2386 | 2568073 | Plus      |
| 100386930  | fmtC  |                                                            | SAUSA300_1255 | 1382617 | Plus      |
| 100362832  |       |                                                            | SAUSA300_0230 | 277410  | Plus      |
| 100382595  |       |                                                            | SAUSA300_1006 | 1102266 | Minus     |
| 100335065  |       |                                                            | SAUSA300_0794 | 878487  | Minus     |
| 100331513  | kdpD  |                                                            | SAUSA300_2035 | 2198332 | Plus      |
| 100338022  |       |                                                            | SAUSA300_2139 | 2314859 | Minus     |
| 100337617  | agrB  |                                                            | SAUSA300_1989 | 2147091 | Minus     |
| 100336976  |       |                                                            | SAUSA300_1415 | 1579019 | Plus      |
| 100331489  |       |                                                            | SAUSA300_1806 | 1989459 | Plus      |
| 0100384538 | purL  | phosphoribosylformylglyci<br>namidine synthase II          | SAUSA300_0971 | 1063638 | Minus     |
| 100384259  | -     |                                                            | SAUSA300_0361 | 415096  | Plus      |
| 100383833  | -     |                                                            | SAUSA300_2369 | 2546766 | Minus     |
| 0100382939 |       | phiSLT ORF 104b-like<br>protein                            | SAUSA300_1406 | 1572476 | Minus     |
| 100384637  | ureB  |                                                            | SAUSA300_2239 | 2406062 | Minus     |
| 100384669  | -     |                                                            | SAUSA300_0413 | 466284  | Minus     |
| 100384534  |       |                                                            | SAUSA300_1843 | 2004587 | Plus      |
| 100331502  | frp   |                                                            | SAUSA300_2462 | 2659048 | Plus      |
| 100362907  | glpD  |                                                            | SAUSA300_1193 | 1314964 | Plus      |
| 0100338001 |       | oxidoreductase, aldo/keto<br>reductase family              | SAUSA300_1450 | 1602592 | Minus     |
| 100384666  | -     |                                                            | SAUSA300_2492 | 2695689 | Minus     |

|            |      |                                                 |               |         |       |
|------------|------|-------------------------------------------------|---------------|---------|-------|
| 100384690  | -    |                                                 | SAUSA300_1437 | 1590556 | Minus |
| 100362145  |      |                                                 | SAUSA300_0556 | 629623  | Plus  |
| 0100338032 | spsA | signal peptidase IA                             | SAUSA300_0867 | 947399  | Plus  |
| 100384047  | -    |                                                 | SAUSA300_0692 | 768204  | Plus  |
| 100331482  |      |                                                 | SAUSA300_0134 | 152803  | Minus |
| 100383592  | -    |                                                 | SAUSA300_2264 | 2433751 | Plus  |
| 100385193  | -    |                                                 | SAUSA300_1890 | 2055267 | Minus |
| 100331484  | fmhA |                                                 | SAUSA300_2356 | 2532409 | Minus |
| 100383608  | opuD |                                                 | SAUSA300_1245 | 1364732 | Plus  |
| 100362091  |      |                                                 | SAUSA300_1247 | 1370026 | Plus  |
| 100331464  |      |                                                 | SAUSA300_0346 | 398196  | Plus  |
| 100384201  | -    |                                                 | SAUSA300_0033 | 41313   | Plus  |
| 100331557  | rot  |                                                 | SAUSA300_1708 | 1891199 | Plus  |
| 100333168  |      |                                                 | SAUSA300_0110 | 124250  | Plus  |
| 100384996  | -    |                                                 | SAUSA300_0321 | 375401  | Minus |
| 100386896  | hlgA |                                                 | SAUSA300_2365 | 2542477 | Plus  |
| 100388003  | cidC |                                                 | SAUSA300_2477 | 2676008 | Minus |
| 100337677  | coa  |                                                 | SAUSA300_0224 | 267000  | Plus  |
| 0100384219 | -    | hypothetical protein                            | SAUSA300_1214 | 1333353 | Minus |
| 100384693  | tig  |                                                 | SAUSA300_1622 | 1777106 | Minus |
| 100331491  |      |                                                 | SAUSA300_1389 | 1554009 | Minus |
| 100385000  | arlS |                                                 | SAUSA300_1307 | 1441507 | Minus |
| 0120005532 | -    | hypothetical protein                            | SAUSA300_0545 | 610384  | Plus  |
| 100362245  |      |                                                 | SAUSA300_0113 | 129639  | Plus  |
| 100384808  | phnE |                                                 | SAUSA300_0143 | 162820  | Minus |
| 100331490  |      |                                                 | SAUSA300_1324 | 1455108 | Minus |
| 100331500  |      |                                                 | SAUSA300_2621 | 2848650 | Plus  |
| 100331485  | xseA |                                                 | SAUSA300_1472 | 1627924 | Minus |
| 100386862  | oppC |                                                 | SAUSA300_0888 | 975597  | Plus  |
| 100386931  |      |                                                 | SAUSA300_1224 | 1341408 | Minus |
| 0100386856 |      | conserved hypothetical protein                  | SAUSA300_0356 | 407746  | Minus |
| 100384080  | oppD |                                                 | SAUSA300_0889 | 976851  | Minus |
| 100385199  | -    |                                                 | SAUSA300_1973 | 2127953 | Minus |
| 100384654  | -    |                                                 | SAUSA300_1524 | 1675697 | Minus |
| 100333148  |      |                                                 | SAUSA300_0275 | 328083  | Minus |
| 100384941  | -    |                                                 | SAUSA300_1398 | 1566169 | Plus  |
| 120005493  | smc  |                                                 | SAUSA300_1127 | 1233434 | Plus  |
| 1063922971 | -    | superantigen-like protein 5                     | SAUSA300_0399 | 451632  | Plus  |
| 0100386872 | epiD | lantibiotic epidermin biosynthesis protein EpiD | SAUSA300_1764 | 1949539 | Minus |
| 100385141  |      |                                                 | SAUSA300_2410 | 2595660 | Minus |
| 100331477  |      |                                                 | SAUSA300_0809 | 887874  | Minus |
| 0100338029 | thil | thiamine biosynthesis protein Thil              | SAUSA300_1661 | 1826955 | Plus  |
| 100331506  |      |                                                 | SAUSA300_0291 | 345598  | Plus  |
| 100382567  | scrR |                                                 | SAUSA300_1995 | 2153414 | Plus  |
| 100362144  | fruA |                                                 | SAUSA300_0685 | 759505  | Plus  |
| 100333138  | rho  |                                                 | SAUSA300_2075 | 2237096 | Minus |
| 100384076  | -    |                                                 | SAUSA300_1349 | 1516693 | Minus |
| 100386857  |      |                                                 | SAUSA300_0580 | 654306  | Minus |
| 100386897  |      |                                                 | SAUSA300_1084 | 1185159 | Plus  |
| 100384989  | -    |                                                 | SAUSA300_1399 | 1566494 | Minus |
| 100336959  |      |                                                 | SAUSA300_1412 | 1578198 | Minus |
| 100331538  |      |                                                 | SAUSA300_2136 | 2310400 | Minus |
| 100331532  |      |                                                 | SAUSA300_2578 | 2794698 | Minus |
| 100384066  | -    |                                                 | SAUSA300_2233 | 2400071 | Minus |
| 100383601  | -    |                                                 | SAUSA300_2251 | 2418757 | Plus  |
| 100384016  | -    |                                                 | SAUSA300_1577 | 1727948 | Plus  |
| 1063923050 | -    |                                                 | SAUSA300_1032 | 1128044 | Plus  |
| 120005524  | -    |                                                 | SAUSA300_1590 | 1741466 | Minus |
| 100383610  | -    |                                                 | SAUSA300_0941 | 1029865 | Plus  |
| 100383663  | rocD |                                                 | SAUSA300_0187 | 216791  | Minus |
| 100362919  |      |                                                 | SAUSA300_0192 | 223981  | Minus |
| 100384165  | lepA |                                                 | SAUSA300_1544 | 1696478 | Plus  |
| 100333116  |      |                                                 | SAUSA300_1927 | 2091466 | Plus  |
| 100331495  | sbi  |                                                 | SAUSA300_2364 | 2540330 | Plus  |
| 100362128  |      |                                                 | SAUSA300_0968 | 1061053 | Minus |
| 100383647  | purM |                                                 | SAUSA300_0973 | 1066376 | Minus |
| 100384659  | -    |                                                 | SAUSA300_0349 | 401313  | Plus  |

|            |        |  |               |         |       |
|------------|--------|--|---------------|---------|-------|
| 1063923032 | -      |  | SAUSA300_0519 | 580566  | Plus  |
| 100384049  | -      |  | SAUSA300_2236 | 2403589 | Minus |
| 100336982  |        |  | SAUSA300_1326 | 1456445 | Minus |
| 100386919  | cobl   |  | SAUSA300_2323 | 2497159 | Minus |
| 100331466  | fmtB   |  | SAUSA300_2109 | 2281766 | Plus  |
| 100331493  |        |  | SAUSA300_2316 | 2491051 | Plus  |
| 100383985  | -      |  | SAUSA300_1204 | 1327550 | Minus |
| 100384652  | -      |  | SAUSA300_2327 | 2503604 | Plus  |
| 100383624  | -      |  | SAUSA300_0266 | 318464  | Plus  |
| 100331488  | prfC   |  | SAUSA300_0921 | 1010440 | Plus  |
| 100384127  | -      |  | SAUSA300_1691 | 1866469 | Minus |
| 100385302  | -      |  | SAUSA300_1488 | 1643211 | Minus |
| 100331544  | fhuA   |  | SAUSA300_0633 | 708209  | Plus  |
| 100331496  | arcR   |  | SAUSA300_2566 | 2778015 | Minus |
| 100384702  | -      |  | SAUSA300_1892 | 2057613 | Plus  |
| 100362882  |        |  | SAUSA300_0535 | 599576  | Plus  |
| 100382923  | nth    |  | SAUSA300_1343 | 1508570 | Minus |
| 100382958  |        |  | SAUSA300_1699 | 1874343 | Plus  |
| 100331469  |        |  | SAUSA300_1060 | 1160127 | Plus  |
| 100331478  |        |  | SAUSA300_2377 | 2556526 | Plus  |
| 100331543  |        |  | SAUSA300_0335 | 387689  | Plus  |
| 100331503  | oppA   |  | SAUSA300_0891 | 978738  | Plus  |
| 120005557  | pyk    |  | SAUSA300_1644 | 1805673 | Minus |
| 100331467  |        |  | SAUSA300_0013 | 17638   | Plus  |
| 100362150  |        |  | SAUSA300_0324 | 377166  | Plus  |
| 100383842  | sdaAB  |  | SAUSA300_2470 | 2666855 | Plus  |
| 100383595  | -      |  | SAUSA300_1536 | 1686432 | Minus |
| 100331517  | fumC   |  | SAUSA300_1801 | 1985575 | Plus  |
| 100331480  |        |  | SAUSA300_1871 | 2031718 | Minus |
| 100331525  |        |  | SAUSA300_2363 | 2539469 | Minus |
| 100362879  |        |  | SAUSA300_2045 | 2210167 | Plus  |
| 100331540  | lytN   |  | SAUSA300_1140 | 1249506 | Minus |
| 100382563  |        |  | SAUSA300_1170 | 1288813 | Plus  |
| 120005529  | -      |  | SAUSA300_0793 | 877038  | Plus  |
| 100384527  |        |  | SAUSA300_1501 | 1654560 | Plus  |
| 100384520  |        |  | SAUSA300_2300 | 2472746 | Plus  |
| 100333150  |        |  | SAUSA300_1440 | 1594587 | Minus |
| 100362900  | polA   |  | SAUSA300_1423 | 1582749 | Plus  |
| 100384109  | -      |  | SAUSA300_2321 | 2495829 | Plus  |
| 100385210  | -      |  | SAUSA300_1207 | 1328773 | Plus  |
| 100383611  | tetR   |  | SAUSA300_2599 | 2826369 | Minus |
| 100331527  |        |  | SAUSA300_2519 | 2722595 | Plus  |
| 100383686  | -      |  | SAUSA300_2521 | 2724919 | Plus  |
| 100383803  | -      |  | SAUSA300_2542 | 2747730 | Plus  |
| 100384471  | -      |  | SAUSA300_2030 | 2191672 | Plus  |
| 100336975  | opp-2B |  | SAUSA300_1276 | 1404877 | Minus |
| 100385222  | kdpE   |  | SAUSA300_2036 | 2200367 | Plus  |
| 100362090  | dapD   |  | SAUSA300_1290 | 1420766 | Plus  |
| 100384159  | -      |  | SAUSA300_0483 | 542917  | Plus  |
| 100338086  |        |  | SAUSA300_0645 | 719234  | Plus  |
| 100331504  |        |  | SAUSA300_0269 | 321353  | Minus |
| 100331539  |        |  | SAUSA300_1417 | 1579690 | Minus |
| 100331494  |        |  | SAUSA300_2523 | 2726060 | Minus |
| 100331519  | cap5C  |  | SAUSA300_0154 | 175663  | Minus |
| 100331515  |        |  | SAUSA300_0265 | 317695  | Plus  |
| 100386911  |        |  | SAUSA300_1225 | 1342718 | Plus  |
| 100362860  |        |  | SAUSA300_0925 | 1017160 | Minus |
| 100384822  | sgtB   |  | SAUSA300_1855 | 2017952 | Plus  |
| 100331472  | phnE   |  | SAUSA300_0142 | 161835  | Plus  |
| 100331554  |        |  | SAUSA300_1906 | 2073860 | Plus  |
| 100362953  | ear    |  | SAUSA300_0815 | 894979  | Plus  |
| 100362871  |        |  | SAUSA300_2311 | 2483561 | Plus  |
| 100331516  | tatC   |  | SAUSA300_0347 | 400477  | Plus  |
| 100362957  |        |  | SAUSA300_2137 | 2311884 | Plus  |
| 100384043  | -      |  | SAUSA300_1384 | 1550095 | Minus |
| 100362906  |        |  | SAUSA300_0125 | 144023  | Plus  |
| 100331479  | pcp    |  | SAUSA300_2623 | 2850209 | Plus  |
| 100384038  | -      |  | SAUSA300_0402 | 454740  | Minus |
| 1063922975 | -      |  | SAUSA300_0827 | 907925  | Minus |
| 100338039  |        |  | SAUSA300_0034 | 43944   | Minus |
| 100331471  | deoD   |  | SAUSA300_0138 | 157298  | Minus |

|            |       |  |               |         |       |
|------------|-------|--|---------------|---------|-------|
| 100331537  |       |  | SAUSA300_2588 | 2811157 | Minus |
| 100362858  | pbuX  |  | SAUSA300_0387 | 437314  | Plus  |
| 100384653  | narI  |  | SAUSA300_2340 | 2514490 | Plus  |
| 100362970  |       |  | SAUSA300_1738 | 1922533 | Plus  |
| 100333123  |       |  | SAUSA300_0812 | 891465  | Minus |
| 100383976  | saeR  |  | SAUSA300_0691 | 767648  | Minus |
| 100331551  |       |  | SAUSA300_0200 | 236321  | Minus |
| 100331533  | ureC  |  | SAUSA300_2240 | 2406472 | Minus |
| 100362870  |       |  | SAUSA300_2449 | 2645873 | Minus |
| 120005741  | -     |  | SAUSA300_0397 | 449143  | Minus |
| 120005737  |       |  | SAUSA300_0565 | 639631  | Plus  |
| 100383630  | ureG  |  | SAUSA300_2243 | 2409184 | Plus  |
| 100383971  | opuCc |  | SAUSA300_2391 | 2575235 | Minus |
| 100384556  | -     |  | SAUSA300_1213 | 1331754 | Plus  |
| 100386933  | srtB  |  | SAUSA300_1034 | 1129687 | Plus  |
| 100362157  |       |  | SAUSA300_0671 | 744574  | Plus  |
| 100331492  |       |  | SAUSA300_0236 | 285432  | Minus |
| 100331501  |       |  | SAUSA300_1421 | 1581103 | Minus |
| 100384122  | -     |  | SAUSA300_1937 | 2104413 | Minus |
| 100386932  |       |  | SAUSA300_0998 | 1094220 | Plus  |
| 100362857  |       |  | SAUSA300_0677 | 751387  | Plus  |
| 100362872  | opuCd |  | SAUSA300_2390 | 2574121 | Plus  |
| 100384714  | -     |  | SAUSA300_0041 | 51386   | Plus  |
| 100384809  |       |  | SAUSA300_0199 | 233875  | Minus |
| 100362153  |       |  | SAUSA300_0096 | 104280  | Plus  |
| 100362966  | guaC  |  | SAUSA300_1235 | 1352896 | Minus |
| 100384815  |       |  | SAUSA300_2268 | 2438972 | Minus |
| 100382999  | mobB  |  | SAUSA300_2223 | 2392072 | Minus |
| 100384706  | clpP  |  | SAUSA300_0752 | 838636  | Plus  |
| 100384533  |       |  | SAUSA300_1283 | 1411926 | Minus |
| 100384496  | murA  |  | SAUSA300_2055 | 2219009 | Minus |
| 100362875  |       |  | SAUSA300_2418 | 2605048 | Minus |
| 100331550  |       |  | SAUSA300_1458 | 1612878 | Minus |
| 100338046  |       |  | SAUSA300_0371 | 423046  | Plus  |
| 100362256  |       |  | SAUSA300_0133 | 151475  | Minus |
| 100362959  |       |  | SAUSA300_0549 | 622487  | Plus  |
| 100385138  | -     |  | SAUSA300_0553 | 627721  | Minus |
| 120005690  | nusB  |  | SAUSA300_1473 | 1628048 | Minus |
| 100384689  | -     |  | SAUSA300_1938 | 2105604 | Minus |
| 100383014  |       |  | SAUSA300_0872 | 957047  | Plus  |
| 100384048  | -     |  | SAUSA300_0788 | 874785  | Plus  |
| 100362967  |       |  | SAUSA300_2545 | 2750898 | Plus  |
| 100362856  |       |  | SAUSA300_0424 | 475137  | Plus  |
| 100331553  | gltB  |  | SAUSA300_0445 | 497606  | Minus |
| 100333117  |       |  | SAUSA300_0745 | 831375  | Minus |
| 100383631  | -     |  | SAUSA300_0276 | 328688  | Minus |
| 100362978  | rsgA  |  | SAUSA300_1114 | 1220590 | Minus |
| 100362876  | sgtA  |  | SAUSA300_1676 | 1843169 | Minus |
| 100337640  |       |  | SAUSA300_0648 | 721925  | Plus  |
| 100333097  |       |  | SAUSA300_2254 | 2420855 | Plus  |
| 100384065  | -     |  | SAUSA300_2632 | 2858907 | Plus  |
| 100383897  | -     |  | SAUSA300_0704 | 779372  | Minus |
| 120005778  | -     |  | SAUSA300_1687 | 1860618 | Plus  |
| 120005547  | -     |  | SAUSA300_1907 | 2074145 | Minus |
| 120005742  | -     |  | SAUSA300_0582 | 655808  | Minus |
| 100363018  |       |  | SAUSA300_0881 | 968294  | Minus |
| 120005689  | -     |  | SAUSA300_0992 | 1088138 | Minus |
| 120005800  | -     |  | SAUSA300_1208 | 1329583 | Minus |
| 120005740  | -     |  | SAUSA300_1474 | 1628544 | Minus |
| 100384051  | hutG  |  | SAUSA300_2281 | 2453715 | Plus  |
| 100333127  |       |  | SAUSA300_0114 | 130785  | Minus |
| 100331542  |       |  | SAUSA300_0474 | 532667  | Plus  |
| 100331552  | clfB  |  | SAUSA300_2565 | 2776958 | Plus  |
| 100362873  | acuC  |  | SAUSA300_1681 | 1851987 | Minus |
| 100362956  |       |  | SAUSA300_0010 | 14965   | Minus |
| 100331555  |       |  | SAUSA300_1897 | 2063708 | Plus  |
| 100362865  |       |  | SAUSA300_1744 | 1925912 | Minus |
| 100362260  |       |  | SAUSA300_0362 | 416265  | Minus |
| 100384078  | -     |  | SAUSA300_0344 | 396327  | Minus |
| 1063923007 | -     |  | SAUSA300_1011 | 1106098 | Minus |
| 100383634  | rpoF  |  | SAUSA300_2022 | 2185624 | Plus  |

|           |       |  |               |         |       |
|-----------|-------|--|---------------|---------|-------|
| 100362905 |       |  | SAUSA300_0432 | 485124  | Plus  |
| 120005699 | lpdA  |  | SAUSA300_1467 | 1621716 | Minus |
| 120005784 | -     |  | SAUSA300_2352 | 2530143 | Minus |
| 100384150 | -     |  | SAUSA300_2433 | 2618220 | Minus |
| 100331523 | pbp3  |  | SAUSA300_1512 | 1663376 | Minus |
| 100331528 |       |  | SAUSA300_2259 | 2429398 | Minus |
| 100362886 | fadD  |  | SAUSA300_0227 | 273656  | Minus |
| 100384472 | accC  |  | SAUSA300_1563 | 1713537 | Plus  |
| 100362954 |       |  | SAUSA300_1334 | 1499130 | Plus  |
| 100383850 | -     |  | SAUSA300_0084 | 92919   | Minus |
| 120005801 | -     |  | SAUSA300_0029 | 36938   | Minus |
| 120005766 |       |  | SAUSA300_0426 | 479757  | Minus |
| 100384991 | -     |  | SAUSA300_2616 | 2843282 | Plus  |
| 100362868 |       |  | SAUSA300_0721 | 800982  | Plus  |
| 100333112 |       |  | SAUSA300_0132 | 150264  | Minus |
| 120005688 | tgt   |  | SAUSA300_1595 | 1750457 | Minus |
| 100362869 |       |  | SAUSA300_1867 | 2027821 | Plus  |
| 100362912 |       |  | SAUSA300_2554 | 2763883 | Plus  |
| 100363024 | Cap5A |  | SAUSA300_0152 | 174200  | Plus  |
| 100331549 | oppF  |  | SAUSA300_0893 | 981984  | Plus  |
| 100331541 |       |  | SAUSA300_1318 | 1450432 | Minus |
| 100331468 |       |  | SAUSA300_2446 | 2641772 | Minus |
| 100384727 | -     |  | SAUSA300_1182 | 1301339 | Minus |
| 100384568 | -     |  | SAUSA300_1051 | 1149987 | Minus |
| 100337674 |       |  | SAUSA300_0512 | 573107  | Plus  |
| 100362115 | mutS  |  | SAUSA300_1188 | 1307319 | Minus |
| 100385157 | -     |  | SAUSA300_0899 | 987925  | Minus |
| 100362973 |       |  | SAUSA300_0247 | 296308  | Minus |
| 100384151 | -     |  | SAUSA300_0598 | 672496  | Plus  |
| 100331529 |       |  | SAUSA300_0272 | 324699  | Minus |
| 100333114 |       |  | SAUSA300_0734 | 814844  | Minus |
| 100362972 |       |  | SAUSA300_0103 | 112722  | Plus  |
| 100362155 |       |  | SAUSA300_0222 | 264179  | Minus |
| 120005548 | carB  |  | SAUSA300_1096 | 1200409 | Minus |
| 100333113 | trpC  |  | SAUSA300_1265 | 1393458 | Plus  |
| 100362931 |       |  | SAUSA300_1961 | 2118980 | Plus  |
| 100383591 | -     |  | SAUSA300_1674 | 1840321 | Plus  |
| 100384969 | -     |  | SAUSA300_2513 | 2717696 | Minus |
| 100384052 | -     |  | SAUSA300_0376 | 426367  | Minus |
| 100384542 | hlgC  |  | SAUSA300_2366 | 2543979 | Plus  |
| 120005720 | -     |  | SAUSA300_0243 | 292853  | Plus  |
| 120005788 | -     |  | SAUSA300_1502 | 1654817 | Minus |
| 100331473 |       |  | SAUSA300_1504 | 1657056 | Minus |
| 100331520 |       |  | SAUSA300_2417 | 2603175 | Plus  |
| 100362106 |       |  | SAUSA300_0729 | 809662  | Minus |
| 100384977 | -     |  | SAUSA300_2056 | 2219904 | Minus |
| 120005567 | -     |  | SAUSA300_1337 | 1502570 | Minus |
| 100362255 | hemL  |  | SAUSA300_1614 | 1768561 | Plus  |
| 100362960 | crtN  |  | SAUSA300_2498 | 2703289 | Plus  |
| 100337667 |       |  | SAUSA300_2528 | 2730104 | Minus |
| 100362910 |       |  | SAUSA300_0428 | 482877  | Plus  |
| 100362911 |       |  | SAUSA300_1054 | 1152561 | Plus  |
| 100362933 |       |  | SAUSA300_1329 | 1491097 | Plus  |
| 100331486 |       |  | SAUSA300_0202 | 238430  | Plus  |
| 100384523 | fhuG  |  | SAUSA300_0635 | 710355  | Plus  |
| 100384072 | mutS2 |  | SAUSA300_1043 | 1140726 | Minus |
| 100362258 |       |  | SAUSA300_0209 | 247380  | Minus |
| 100362982 | pyrE  |  | SAUSA300_1098 | 1202937 | Plus  |
| 100362958 |       |  | SAUSA300_2531 | 2732115 | Minus |
| 100383582 | -     |  | SAUSA300_2308 | 2480941 | Plus  |
| 100362190 |       |  | SAUSA300_2384 | 2564287 | Minus |
| 100331475 |       |  | SAUSA300_2501 | 2707175 | Plus  |
| 100383765 | -     |  | SAUSA300_0336 | 388916  | Minus |
| 100383759 | -     |  | SAUSA300_2614 | 2841907 | Plus  |
| 100386944 |       |  | SAUSA300_1846 | 2007547 | Plus  |
| 120005836 | -     |  | SAUSA300_0504 | 564216  | Plus  |
| 100362930 |       |  | SAUSA300_0880 | 967641  | Minus |
| 100362913 | putA  |  | SAUSA300_1711 | 1894074 | Minus |
| 100362169 |       |  | SAUSA300_0975 | 1068204 | Minus |
| 100331463 | scrB  |  | SAUSA300_1994 | 2152145 | Plus  |
| 100362961 |       |  | SAUSA300_0279 | 331711  | Plus  |



|           |       |  |               |         |           |
|-----------|-------|--|---------------|---------|-----------|
| 100362976 | ychF  |  | SAUSA300_0364 | 417446  | Plus      |
| 100363029 | glpP  |  | SAUSA300_1190 | 1311465 | Minus     |
| 100362862 | gpmA  |  | SAUSA300_2362 | 2538183 | Plus      |
| 100383843 | -     |  | SAUSA300_2397 | 2583325 | Plus      |
| 100331470 | fba   |  | SAUSA300_2079 | 2242283 | Plus      |
| 100362985 | panE  |  | SAUSA300_2388 | 2571566 | Minus     |
| 100384161 | -     |  | SAUSA300_1497 | 1651191 | Minus     |
| 100363006 |       |  | SAUSA300_1029 | 1125260 | Plus      |
| 100361683 | ddh   |  | SAUSA300_2463 | 2659668 | Plus      |
| 100337619 | uvrB  |  | SAUSA300_0741 | 824359  | Plus      |
| 100363017 |       |  | SAUSA300_1236 | 1353916 | Plus      |
| 100362968 |       |  | SAUSA300_2571 | 2783724 | Minus     |
| 100333111 |       |  | SAUSA300_0676 | 749637  | Minus     |
| 100333098 |       |  | SAUSA300_1533 | 1683634 | Minus     |
| 100384069 | -     |  | SAUSA300_2502 | 2707439 | Plus      |
| 100362878 |       |  | SAUSA300_1651 | 1817151 | Plus      |
| 100362934 |       |  | SAUSA300_1710 | 1893309 | Minus     |
| 100362896 |       |  | SAUSA300_1844 | 2005303 | Plus      |
| 100331511 |       |  | SAUSA300_0711 | 789454  | Minus     |
| 100384107 | -     |  | SAUSA300_1021 | 1118439 | Plus      |
| 100384547 | crtM  |  | SAUSA300_2499 | 2704173 | Plus      |
| 120005808 |       |  | SAUSA300_1985 | 2143953 | Plus      |
| 100383622 | gntK  |  | SAUSA300_2443 | 2639290 | Minus     |
| 100363026 | trpA  |  | SAUSA300_1268 | 1396222 | Minus     |
| 120005533 | gcvH  |  | SAUSA300_0791 | 876457  | Plus      |
| 100333124 |       |  | SAUSA300_0559 | 633537  | Plus      |
| 100384722 | -     |  | SAUSA300_2232 | 2399691 | Minus     |
| 100331510 | pstC  |  | SAUSA300_1282 | 1411021 | Plus      |
| 100383990 | -     |  | SAUSA300_2272 | 2443031 | Plus      |
| 100363031 |       |  | SAUSA300_1559 | 1708787 | Plus      |
| 100362887 |       |  | SAUSA300_1898 | 2065081 | Plus      |
| 100362914 | tcaB  |  | SAUSA300_2301 | 2474403 | Plus      |
| 100333163 |       |  | SAUSA300_0044 | 56087   | Plus      |
| 100362167 |       |  | SAUSA300_0140 | 159238  | Minus     |
| 100362888 |       |  | SAUSA300_1220 | 1338354 | Plus      |
| 100384571 | hslU  |  | SAUSA300_1147 | 1259142 | Minus     |
| 100331499 | pepS  |  | SAUSA300_1860 | 2022739 | Minus     |
| 120005478 |       |  | SAUSA300_0649 | 724769  | Plus      |
| 100384543 |       |  | SAUSA300_1947 | 2111364 | Minus     |
| 100384651 | -     |  | SAUSA300_0770 | 857795  | Plus      |
| 100333171 |       |  | SAUSA300_1041 | 1137289 | Minus     |
| 100362884 | cls   |  | SAUSA300_2044 | 2208601 | Minus     |
| 100384117 | -     |  | SAUSA300_1548 | 1700625 | Plus      |
| 100384050 | -     |  | SAUSA300_0706 | 783605  | Plus      |
| 100386945 |       |  | SAUSA300_2314 | 2488546 | antisense |
| 100331548 | nagA  |  | SAUSA300_0686 | 761388  | Plus      |
| 100331556 |       |  | SAUSA300_2493 | 2696156 | Plus      |
| 100362114 |       |  | SAUSA300_0277 | 330107  | Minus     |
| 100337999 | ribBA |  | SAUSA300_1713 | 1896302 | Minus     |
| 100384020 | glpK  |  | SAUSA300_1192 | 1313810 | Minus     |
| 100386861 |       |  | SAUSA300_2265 | 2435805 | Minus     |
| 100363027 |       |  | SAUSA300_0814 | 893597  | Plus      |
| 100362955 |       |  | SAUSA300_1505 | 1657715 | Minus     |
| 100362268 |       |  | SAUSA300_1847 | 2009813 | Plus      |
| 100385204 | hisD  |  | SAUSA300_2611 | 2838740 | Minus     |
| 100384743 |       |  | SAUSA300_0616 | 687586  | Plus      |
| 100384545 |       |  | SAUSA300_1141 | 1250734 | Plus      |
| 100362997 | lip   |  | SAUSA300_2603 | 2832473 | Minus     |
| 100384112 | atpB  |  | SAUSA300_2064 | 2226763 | Plus      |
| 100362277 |       |  | SAUSA300_0081 | 89656   | Minus     |
| 100363041 |       |  | SAUSA300_1784 | 1966432 | Plus      |
| 100362963 |       |  | SAUSA300_2101 | 2267094 | Plus      |
| 100362952 | feoB  |  | SAUSA300_2487 | 2689379 | Plus      |
| 100362943 |       |  | SAUSA300_2134 | 2308519 | Plus      |
| 100386947 | -     |  | SAUSA300_1948 | 2111681 | Minus     |
| 100333099 |       |  | SAUSA300_0122 | 139897  | Plus      |
| 100333122 | bioB  |  | SAUSA300_2371 | 2548574 | Minus     |
| 100384582 | -     |  | SAUSA300_0223 | 265986  | Plus      |
| 100331546 |       |  | SAUSA300_2424 | 2610315 | Plus      |
| 120005850 | -     |  | SAUSA300_0011 | 15694   | Minus     |
| 100384062 | moeB  |  | SAUSA300_2227 | 2395033 | Plus      |

|           |      |  |               |         |       |
|-----------|------|--|---------------|---------|-------|
| 100384003 | tcaR |  | SAUSA300_2303 | 2476640 | Plus  |
| 100386879 | glcU |  | SAUSA300_2210 | 2377428 | Plus  |
| 100331521 |      |  | SAUSA300_0621 | 694155  | Minus |
| 100384954 | -    |  | SAUSA300_1515 | 1665957 | Plus  |
| 100362855 | tdk  |  | SAUSA300_2073 | 2235328 | Minus |
| 100337659 |      |  | SAUSA300_1979 | 2135065 | Plus  |
| 100384037 | -    |  | SAUSA300_0431 | 484659  | Minus |
| 100384063 | -    |  | SAUSA300_1020 | 1117614 | Minus |
| 100386908 |      |  | SAUSA300_1974 | 2129354 | Plus  |
| 100384519 | rsbW |  | SAUSA300_2023 | 2186013 | Plus  |
| 100362877 |      |  | SAUSA300_0328 | 380284  | Plus  |
| 100362946 |      |  | SAUSA300_2383 | 2562329 | Minus |
| 100384220 | -    |  | SAUSA300_1642 | 1801316 | Plus  |
| 100384119 |      |  | SAUSA300_1310 | 1444213 | Minus |
| 100384518 | thiM |  | SAUSA300_2048 | 2213425 | Plus  |
| 100384490 | narJ |  | SAUSA300_2341 | 2515045 | Plus  |
| 100384160 | -    |  | SAUSA300_0924 | 1015636 | Plus  |
| 100335081 | epiB |  | SAUSA300_1766 | 1953333 | Plus  |
| 100362945 | ald  |  | SAUSA300_1655 | 1821307 | Plus  |
| 100383637 | -    |  | SAUSA300_0420 | 472389  | Plus  |
| 100363043 | ilvE |  | SAUSA300_0539 | 605331  | Plus  |
| 100384750 |      |  | SAUSA300_2274 | 2445303 | Plus  |
| 100384094 | -    |  | SAUSA300_2083 | 2246216 | Plus  |
| 100387038 | menD |  | SAUSA300_0946 | 1034876 | Minus |
| 100384001 | -    |  | SAUSA300_1743 | 1925571 | Minus |
| 100362168 |      |  | SAUSA300_2161 | 2338099 | Minus |
| 100384459 | -    |  | SAUSA300_2125 | 2298651 | Plus  |
| 100362937 |      |  | SAUSA300_0203 | 239849  | Plus  |
| 100362942 |      |  | SAUSA300_1438 | 1590795 | Plus  |
| 100363040 |      |  | SAUSA300_0025 | 31312   | Plus  |
| 100383994 | -    |  | SAUSA300_2290 | 2462629 | Minus |
| 100383800 | -    |  | SAUSA300_0312 | 363133  | Minus |
| 100333115 | ptsG |  | SAUSA300_0191 | 223044  | Minus |
| 100338024 |      |  | SAUSA300_2269 | 2439506 | Minus |
| 100362891 |      |  | SAUSA300_0171 | 194221  | Plus  |
| 100362935 | glyA |  | SAUSA300_2067 | 2230555 | Plus  |
| 120005752 |      |  | SAUSA300_1088 | 1190660 | Minus |
| 120005565 | -    |  | SAUSA300_0957 | 1049071 | Minus |
| 100383975 | -    |  | SAUSA300_0557 | 630414  | Plus  |
| 100384054 | -    |  | SAUSA300_0938 | 1027194 | Plus  |
| 100384673 | -    |  | SAUSA300_0326 | 378672  | Plus  |
| 100333139 |      |  | SAUSA300_0283 | 336420  | Minus |
| 100333134 |      |  | SAUSA300_1807 | 1990222 | Plus  |
| 120005693 | -    |  | SAUSA300_1422 | 1581275 | Minus |
| 100386885 | mscL |  | SAUSA300_1244 | 1364296 | Minus |
| 100385195 | -    |  | SAUSA300_1683 | 1855446 | Plus  |
| 100333151 | gidB |  | SAUSA300_2645 | 2868328 | Plus  |
| 100362166 |      |  | SAUSA300_1267 | 1394804 | Plus  |
| 100331487 |      |  | SAUSA300_1259 | 1386604 | Plus  |
| 120005776 | panC |  | SAUSA300_2533 | 2734509 | Plus  |
| 100333125 | aur  |  | SAUSA300_2572 | 2785279 | Plus  |
| 100362936 |      |  | SAUSA300_0123 | 141351  | Minus |
| 100384018 | -    |  | SAUSA300_0798 | 881430  | Plus  |
| 100362947 |      |  | SAUSA300_0466 | 524839  | Plus  |
| 120005821 | -    |  | SAUSA300_0068 | 76107   | Plus  |
| 100384131 | -    |  | SAUSA300_2522 | 2725661 | Plus  |
| 100386900 |      |  | SAUSA300_1946 | 2111081 | Plus  |
| 100384114 | -    |  | SAUSA300_0981 | 1076773 | Minus |
| 100333102 | mfd  |  | SAUSA300_0481 | 538266  | Plus  |
| 100385306 | -    |  | SAUSA300_1875 | 2035309 | Minus |
| 100384993 | -    |  | SAUSA300_0322 | 376789  | Minus |
| 100337668 | trpD |  | SAUSA300_1264 | 1392416 | Plus  |
| 100333126 |      |  | SAUSA300_1800 | 1983096 | Plus  |
| 120005811 | hemB |  | SAUSA300_1615 | 1769116 | Plus  |
| 100384115 |      |  | SAUSA300_1470 | 1626081 | Minus |
| 100384767 | cbf1 |  | SAUSA300_1791 | 1973412 | Minus |
| 100383598 | cbiO |  | SAUSA300_2176 | 2356683 | Minus |
| 100385143 |      |  | SAUSA300_0214 | 252975  | Minus |
| 100333158 |      |  | SAUSA300_1547 | 1700345 | Plus  |
| 100384530 | cdr  |  | SAUSA300_0873 | 958326  | Minus |
| 100383962 | ahpC |  | SAUSA300_0380 | 429979  | Minus |

|            |      |  |               |         |           |
|------------|------|--|---------------|---------|-----------|
| 100384142  | -    |  | SAUSA300_1309 | 1443253 | Plus      |
| 120005725  | -    |  | SAUSA300_1566 | 1715877 | Plus      |
| 100386946  |      |  | SAUSA300_1372 | 1540582 | sense     |
| 100384139  | seq  |  | SAUSA300_0801 | 884483  | Plus      |
| 120005786  | codY |  | SAUSA300_1148 | 1260314 | Plus      |
| 100337998  |      |  | SAUSA300_0834 | 913098  | Minus     |
| 100362831  |      |  | SAUSA300_0097 | 105476  | Minus     |
| 120005765  | -    |  | SAUSA300_0997 | 1093798 | Plus      |
| 100384028  | -    |  | SAUSA300_0945 | 1033672 | Minus     |
| 100385309  | pfoR |  | SAUSA300_0310 | 360618  | Minus     |
| 100385208  | -    |  | SAUSA300_0913 | 1002063 | Minus     |
| 100384962  | -    |  | SAUSA300_2530 | 2731645 | Minus     |
| 100384724  | -    |  | SAUSA300_0197 | 232070  | Minus     |
| 100384158  | -    |  | SAUSA300_1106 | 1212131 | Plus      |
| 100361680  | lipA |  | SAUSA300_0829 | 909901  | Plus      |
| 100361678  |      |  | SAUSA300_2642 | 2866343 | Minus     |
| 100384146  |      |  | SAUSA300_0647 | 721112  | Minus     |
| 100384759  |      |  | SAUSA300_1787 | 1969248 | Plus      |
| 100384002  | -    |  | SAUSA300_0808 | 887161  | Minus     |
| 100384723  | htrA |  | SAUSA300_0923 | 1013366 | Plus      |
| 100383771  | -    |  | SAUSA300_0372 | 423760  | Minus     |
| 100384570  | -    |  | SAUSA300_0566 | 640879  | Minus     |
| 100384580  | -    |  | SAUSA300_1449 | 1602172 | Minus     |
| 100383788  | -    |  | SAUSA300_0129 | 147329  | Plus      |
| 100384833  |      |  | SAUSA300_1333 | 1497978 | Minus     |
| 100362944  |      |  | SAUSA300_2099 | 2262502 | Plus      |
| 100384027  | spiD |  | SAUSA300_1755 | 1940900 | Plus      |
| 100384522  |      |  | SAUSA300_0059 | 66827   | Plus      |
| 100384614  | -    |  | SAUSA300_0859 | 937018  | Minus     |
| 100333149  |      |  | SAUSA300_2374 | 2553081 | Plus      |
| 100363038  |      |  | SAUSA300_0063 | 71563   | Minus     |
| 120005691  | -    |  | SAUSA300_0183 | 212099  | Plus      |
| 120005718  | -    |  | SAUSA300_1386 | 1550802 | Plus      |
| 120005759  |      |  | SAUSA300_1612 | 1765933 | Minus     |
| 100338043  |      |  | SAUSA300_2307 | 2480514 | Plus      |
| 100362889  |      |  | SAUSA300_0229 | 276465  | Plus      |
| 100362929  |      |  | SAUSA300_1864 | 2024364 | Minus     |
| 100333101  |      |  | SAUSA300_0650 | 724879  | Plus      |
| 100386926  |      |  | SAUSA300_1588 | 1740094 | antisense |
| 100384476  | -    |  | SAUSA300_1427 | 1585688 | Minus     |
| 100383978  | -    |  | SAUSA300_1339 | 1503590 | Minus     |
| 100362962  |      |  | SAUSA300_0281 | 334056  | Minus     |
| 100333108  |      |  | SAUSA300_2360 | 2536962 | Plus      |
| 100384697  | -    |  | SAUSA300_1451 | 1604542 | Plus      |
| 100384096  | nagE |  | SAUSA300_1672 | 1838586 | Minus     |
| 100384557  | -    |  | SAUSA300_0094 | 102682  | Plus      |
| 100384593  | -    |  | SAUSA300_0750 | 837603  | Minus     |
| 100333172  | adhE |  | SAUSA300_0151 | 172055  | Minus     |
| 100384949  | lctP |  | SAUSA300_0112 | 126313  | Plus      |
| 100384104  | -    |  | SAUSA300_0816 | 896217  | Plus      |
| 100337675  |      |  | SAUSA300_0947 | 1036286 | Minus     |
| 100363034  |      |  | SAUSA300_0212 | 250980  | Minus     |
| 100385177  |      |  | SAUSA300_1216 | 1333962 | Minus     |
| 100384164  | moeA |  | SAUSA300_2224 | 2392967 | Plus      |
| 120005789  | ebpS |  | SAUSA300_1370 | 1537208 | Minus     |
| 1063923033 | dut  |  | SAUSA300_1949 | 2112189 | Plus      |
| 100383963  | lacC |  | SAUSA300_2153 | 2331678 | Plus      |
| 100333100  | fnbA |  | SAUSA300_2441 | 2635675 | Plus      |
| 100384156  |      |  | SAUSA300_0534 | 598897  | Plus      |
| 100384083  |      |  | SAUSA300_1747 | 1928011 | Minus     |
| 120005763  | -    |  | SAUSA300_0824 | 904437  | Plus      |
| 120005495  | rpmG |  | SAUSA300_1233 | 1351729 | Plus      |
| 120005502  | moaC |  | SAUSA300_2225 | 2393638 | Plus      |
| 100363042  |      |  | SAUSA300_1285 | 1414400 | Minus     |
| 100384746  |      |  | SAUSA300_0516 | 578573  | Minus     |
| 100333141  |      |  | SAUSA300_0718 | 798316  | Plus      |
| 100385132  | -    |  | SAUSA300_1725 | 1908172 | Minus     |
| 100362903  |      |  | SAUSA300_1119 | 1224333 | Minus     |
| 100362849  |      |  | SAUSA300_0245 | 294747  | Plus      |
| 100333140  |      |  | SAUSA300_0254 | 306207  | Minus     |
| 100386910  |      |  | SAUSA300_0337 | 390214  | Plus      |

|            |      |  |               |         |       |
|------------|------|--|---------------|---------|-------|
| 100384824  |      |  | SAUSA300_2631 | 2857968 | Plus  |
| 100384000  | -    |  | SAUSA300_2040 | 2206578 | Plus  |
| 100384025  | trmE |  | SAUSA300_2646 | 2871336 | Plus  |
| 100384676  | rocD |  | SAUSA300_0860 | 937985  | Minus |
| 100362867  |      |  | SAUSA300_0293 | 346805  | Minus |
| 120005774  | -    |  | SAUSA300_0365 | 418476  | Minus |
| 120005694  | gpml |  | SAUSA300_0759 | 847500  | Plus  |
| 100384569  | -    |  | SAUSA300_0638 | 713015  | Minus |
| 100331547  |      |  | SAUSA300_0462 | 522267  | Plus  |
| 100384460  | ansA |  | SAUSA300_1368 | 1534974 | Minus |
| 100331534  |      |  | SAUSA300_2267 | 2438097 | Plus  |
| 100362861  |      |  | SAUSA300_2207 | 2373126 | Plus  |
| 100384501  | treP |  | SAUSA300_0448 | 504787  | Minus |
| 100384106  | -    |  | SAUSA300_1519 | 1670095 | Minus |
| 1063922991 | -    |  | SAUSA300_0234 | 281534  | Plus  |
| 100384782  |      |  | SAUSA300_2415 | 2601585 | Plus  |
| 100383613  | -    |  | SAUSA300_1561 | 1711837 | Minus |
| 100383612  | -    |  | SAUSA300_2395 | 2579007 | Plus  |
| 100333109  |      |  | SAUSA300_0879 | 966789  | Plus  |
| 100333104  |      |  | SAUSA300_2428 | 2613046 | Minus |
| 100384667  | -    |  | SAUSA300_1403 | 1569728 | Plus  |
| 120005566  | -    |  | SAUSA300_0384 | 434825  | Plus  |
| 100385201  | mtlD |  | SAUSA300_2108 | 2277205 | Minus |
| 100333161  |      |  | SAUSA300_2396 | 2581072 | Plus  |
| 1063922976 | -    |  | SAUSA300_0342 | 395018  | Plus  |
| 100383995  | -    |  | SAUSA300_1397 | 1565152 | Plus  |
| 100337692  | recJ |  | SAUSA300_1592 | 1746325 | Minus |
| 100384095  | pdhA |  | SAUSA300_0993 | 1089328 | Plus  |
| 120005729  | -    |  | SAUSA300_0689 | 765550  | Minus |
| 100362132  |      |  | SAUSA300_2213 | 2382606 | Minus |
| 100384093  | phoP |  | SAUSA300_1639 | 1797605 | Plus  |
| 100333160  |      |  | SAUSA300_0656 | 732643  | Minus |
| 100333135  | topB |  | SAUSA300_2208 | 2375770 | Plus  |
| 100333110  |      |  | SAUSA300_2448 | 2643913 | Plus  |
| 100385153  | -    |  | SAUSA300_0174 | 196553  | Plus  |
| 100384039  | ilvN |  | SAUSA300_2008 | 2168457 | Plus  |
| 100384055  | -    |  | SAUSA300_2252 | 2419459 | Minus |
| 100383657  | hemL |  | SAUSA300_1845 | 2005637 | Minus |
| 100362100  | bioA |  | SAUSA300_2372 | 2550029 | Minus |
| 100384831  | narK |  | SAUSA300_2333 | 2509507 | Minus |
| 100333136  |      |  | SAUSA300_1928 | 2094281 | Minus |
| 100384591  | -    |  | SAUSA300_0438 | 492370  | Plus  |
| 120005746  | -    |  | SAUSA300_0687 | 763453  | Plus  |
| 100385172  | -    |  | SAUSA300_0905 | 993655  | Minus |
| 100362165  |      |  | SAUSA300_0654 | 731321  | Plus  |
| 100363010  |      |  | SAUSA300_2157 | 2334150 | Plus  |
| 100362267  |      |  | SAUSA300_2398 | 2584557 | Minus |
| 100333164  |      |  | SAUSA300_0977 | 1071552 | Plus  |
| 100384032  | -    |  | SAUSA300_0423 | 474581  | Minus |
| 100384029  | -    |  | SAUSA300_0952 | 1041841 | Minus |
| 100384583  | dapA |  | SAUSA300_1288 | 1419580 | Plus  |
| 100384631  | -    |  | SAUSA300_2432 | 2617874 | Plus  |
| 100383954  | -    |  | SAUSA300_1799 | 1982694 | Minus |
| 100362247  |      |  | SAUSA300_2097 | 2261917 | Plus  |
| 100384143  | -    |  | SAUSA300_0308 | 358698  | Plus  |
| 100384776  | rpoE |  | SAUSA300_2082 | 2245544 | Minus |
| 100333103  |      |  | SAUSA300_1571 | 1720503 | Plus  |
| 100338009  | lukE |  | SAUSA300_1769 | 1957095 | Minus |
| 120005743  | splE |  | SAUSA300_1754 | 1939868 | Minus |
| 100362253  |      |  | SAUSA300_0109 | 123528  | Plus  |
| 100362254  |      |  | SAUSA300_2328 | 2504247 | Minus |
| 100362932  |      |  | SAUSA300_2247 | 2412448 | Plus  |
| 100333174  |      |  | SAUSA300_1219 | 1337307 | Plus  |
| 100383915  | -    |  | SAUSA300_1366 | 1533810 | Plus  |
| 100384526  |      |  | SAUSA300_1008 | 1103619 | Plus  |
| 1063923008 | -    |  | SAUSA300_0320 | 373968  | Plus  |
| 100362941  |      |  | SAUSA300_1902 | 2070082 | Minus |
| 100362252  | rrfA |  | SAUSA300_0457 | 517815  | Plus  |
| 100362848  |      |  | SAUSA300_2568 | 2780356 | Plus  |
| 100384085  | -    |  | SAUSA300_0601 | 675212  | Plus  |
| 120004834  | -    |  | SAUSA300_0725 | 805293  | Minus |

|            |       |  |               |         |           |
|------------|-------|--|---------------|---------|-----------|
| 100384257  | cap1C |  | SAUSA300_2596 | 2823528 | Minus     |
| 100384628  | -     |  | SAUSA300_0348 | 400666  | Plus      |
| 100384625  | rpsA  |  | SAUSA300_1365 | 1532289 | Minus     |
| 100362948  | pepF  |  | SAUSA300_1278 | 1406055 | Plus      |
| 100361682  |       |  | SAUSA300_2068 | 2231115 | Minus     |
| 100333105  |       |  | SAUSA300_0965 | 1059015 | Plus      |
| 100337623  | mutL  |  | SAUSA300_1189 | 1309783 | Plus      |
| 100337612  | msrA  |  | SAUSA300_1317 | 1449652 | Minus     |
| 100333152  |       |  | SAUSA300_1252 | 1376946 | Minus     |
| 100384572  | -     |  | SAUSA300_1184 | 1303710 | Plus      |
| 100384040  | dapB  |  | SAUSA300_1289 | 1420240 | Plus      |
| 100362986  |       |  | SAUSA300_1929 | 2096369 | Minus     |
| 100385295  | murQ  |  | SAUSA300_0193 | 225272  | Plus      |
| 100385207  | -     |  | SAUSA300_0786 | 873527  | Plus      |
| 120005496  | -     |  | SAUSA300_1023 | 1119108 | Plus      |
| 100384940  | -     |  | SAUSA300_1391 | 1556420 | Minus     |
| 100384022  | -     |  | SAUSA300_0807 | 886816  | Minus     |
| 100383996  | -     |  | SAUSA300_1271 | 1400537 | Plus      |
| 120005514  | splF  |  | SAUSA300_1753 | 1939026 | Plus      |
| 100362847  |       |  | SAUSA300_2612 | 2839640 | Minus     |
| 100384738  | -     |  | SAUSA300_2135 | 2309408 | Minus     |
| 100338066  |       |  | SAUSA300_1064 | 1163722 | Plus      |
| 100383605  | -     |  | SAUSA300_2387 | 2570393 | Plus      |
| 100384584  | -     |  | SAUSA300_0244 | 293521  | Minus     |
| 100333133  |       |  | SAUSA300_2385 | 2567249 | Plus      |
| 120005508  | -     |  | SAUSA300_1935 | 2103638 | Minus     |
| 100385180  |       |  | SAUSA300_2576 | 2789549 | Plus      |
| 100333180  | kdpA  |  | SAUSA300_2034 | 2197159 | Plus      |
| 100362940  |       |  | SAUSA300_0661 | 737685  | Plus      |
| 100362885  | pnpA  |  | SAUSA300_1167 | 1282378 | Minus     |
| 100384663  | metE  |  | SAUSA300_0357 | 410086  | Plus      |
| 100384736  | -     |  | SAUSA300_2636 | 2862516 | Minus     |
| 100384699  | -     |  | SAUSA300_0469 | 528892  | Plus      |
| 100337634  | hemG  |  | SAUSA300_1781 | 1963823 | Minus     |
| 100383760  | hsdM  |  | SAUSA300_0405 | 458003  | Plus      |
| 100384768  |       |  | SAUSA300_0353 | 403393  | Minus     |
| 100384138  | hutI  |  | SAUSA300_2277 | 2449410 | Minus     |
| 100383678  | -     |  | SAUSA300_0707 | 784284  | Plus      |
| 100384589  | -     |  | SAUSA300_2548 | 2754000 | Minus     |
| 100337670  |       |  | SAUSA300_2589 | 2818128 | Plus      |
| 100333120  |       |  | SAUSA300_2138 | 2313495 | Minus     |
| 100386929  |       |  | SAUSA300_1665 | 1830897 | Plus      |
| 100384679  | -     |  | SAUSA300_2235 | 2402500 | Minus     |
| 100384502  | -     |  | SAUSA300_2306 | 2479408 | Plus      |
| 100384024  | -     |  | SAUSA300_0767 | 855899  | Minus     |
| 120005706  | -     |  | SAUSA300_0597 | 671621  | Plus      |
| 100384786  |       |  | SAUSA300_0726 | 806034  | Plus      |
| 100333173  |       |  | SAUSA300_0105 | 116274  | Plus      |
| 100336979  |       |  | SAUSA300_0246 | 295326  | Plus      |
| 100333175  |       |  | SAUSA300_0986 | 1081233 | Plus      |
| 100331522  | sdrC  |  | SAUSA300_0546 | 612004  | Minus     |
| 100386924  |       |  | SAUSA300_1967 | 2122439 | antisense |
| 100333190  |       |  | SAUSA300_1509 | 1660671 | Plus      |
| 100337997  |       |  | SAUSA300_2263 | 2431887 | Minus     |
| 100385202  | -     |  | SAUSA300_2400 | 2586486 | Plus      |
| 120005552  | -     |  | SAUSA300_0561 | 636003  | Plus      |
| 100384458  | recQ  |  | SAUSA300_1371 | 1539398 | Plus      |
| 100333159  |       |  | SAUSA300_2458 | 2656072 | Plus      |
| 1063923046 | -     |  | SAUSA300_0106 | 117833  | Minus     |
| 1063923002 | -     |  | SAUSA300_1599 | 1753438 | Minus     |
| 120005776  | -     |  | SAUSA300_0419 | 471343  | Minus     |
| 100333184  |       |  | SAUSA300_0640 | 714578  | Plus      |
| 100337624  |       |  | SAUSA300_2148 | 2325879 | Plus      |
| 100383664  | -     |  | SAUSA300_0329 | 381780  | Plus      |
| 100383641  | aldA2 |  | SAUSA300_1901 | 2067845 | Minus     |
| 100384632  | -     |  | SAUSA300_0657 | 733784  | Plus      |
| 100383939  | miaA  |  | SAUSA300_1195 | 1317977 | Minus     |
| 100384715  | leuD  |  | SAUSA300_2013 | 2173774 | Minus     |
| 100333170  |       |  | SAUSA300_0194 | 225983  | Plus      |
| 100386899  | ccrA  |  | SAUSA300_0038 | 48443   | Minus     |
| 120005561  | -     |  | SAUSA300_0213 | 251941  | Plus      |

|            |      |  |               |         |       |
|------------|------|--|---------------|---------|-------|
| 100386920  |      |  | SAUSA300_1012 | 1106683 | Minus |
| 100384217  | -    |  | SAUSA300_1658 | 1824350 | Minus |
| 120005511  | -    |  | SAUSA300_1494 | 1647844 | Minus |
| 100338081  |      |  | SAUSA300_2643 | 2867665 | Minus |
| 1063923031 | -    |  | SAUSA300_0904 | 992852  | Plus  |
| 100363011  |      |  | SAUSA300_1854 | 2017054 | Minus |
| 100383670  | -    |  | SAUSA300_2289 | 2461977 | Plus  |
| 100384616  | -    |  | SAUSA300_0918 | 1007404 | Minus |
| 100384664  | -    |  | SAUSA300_0178 | 200087  | Plus  |
| 100337647  |      |  | SAUSA300_1702 | 1884180 | Plus  |
| 100362939  |      |  | SAUSA300_1194 | 1316800 | Minus |
| 100337644  |      |  | SAUSA300_0404 | 456579  | Minus |
| 100384030  | glpF |  | SAUSA300_1191 | 1312615 | Plus  |
| 100383993  | -    |  | SAUSA300_2325 | 2499633 | Plus  |
| 100384006  | -    |  | SAUSA300_2407 | 2592863 | Minus |
| 100384739  | -    |  | SAUSA300_2382 | 2561806 | Plus  |
| 100384617  | miaB |  | SAUSA300_1185 | 1304754 | Minus |
| 100384947  | -    |  | SAUSA300_0338 | 391257  | Plus  |
| 100384749  | hsdR |  | SAUSA300_0196 | 229331  | Plus  |
| 100384765  | deoD |  | SAUSA300_2091 | 2255470 | Minus |
| 100338083  |      |  | SAUSA300_1808 | 1991557 | Minus |
| 100384120  | ahpF |  | SAUSA300_0379 | 428699  | Plus  |
| 100383992  | -    |  | SAUSA300_0618 | 691988  | Minus |
| 100384015  | -    |  | SAUSA300_2359 | 2535289 | Minus |
| 120005531  |      |  | SAUSA300_0257 | 309726  | Minus |
| 100384581  | -    |  | SAUSA300_2334 | 2510287 | Plus  |
| 100337627  | leuB |  | SAUSA300_2011 | 2171323 | Plus  |
| 100337636  |      |  | SAUSA300_2584 | 2805445 | Plus  |
| 100333165  |      |  | SAUSA300_0055 | 64216   | Plus  |
| 100362845  |      |  | SAUSA300_0550 | 625430  | Minus |
| 100384745  |      |  | SAUSA300_0211 | 249864  | Plus  |
| 100384823  | ispE |  | SAUSA300_0472 | 530996  | Plus  |
| 120005503  | -    |  | SAUSA300_0468 | 527794  | Plus  |
| 100337621  |      |  | SAUSA300_2472 | 2669223 | Plus  |
| 100362846  |      |  | SAUSA300_0641 | 715728  | Minus |
| 120005522  | -    |  | SAUSA300_0832 | 911930  | Plus  |
| 100384009  | rsbU |  | SAUSA300_2025 | 2187275 | Minus |
| 100383991  | -    |  | SAUSA300_2127 | 2301274 | Minus |
| 1063922973 | -    |  | SAUSA300_2456 | 2654312 | Plus  |
| 120005754  |      |  | SAUSA300_1960 | 2117329 | Plus  |
| 120005841  | -    |  | SAUSA300_2026 | 2188102 | Minus |
| 100383827  | rexB |  | SAUSA300_0869 | 949262  | Plus  |
| 100385134  | pepF |  | SAUSA300_0902 | 989811  | Plus  |
| 100362130  |      |  | SAUSA300_0147 | 166637  | Minus |
| 100384668  | murA |  | SAUSA300_2078 | 2240671 | Plus  |
| 100384650  | gntP |  | SAUSA300_2442 | 2637238 | Minus |
| 100384149  | -    |  | SAUSA300_2575 | 2788046 | Minus |
| 100337635  |      |  | SAUSA300_0233 | 281138  | Plus  |
| 100337638  |      |  | SAUSA300_0620 | 693817  | Minus |
| 100337646  |      |  | SAUSA300_0771 | 858373  | Plus  |
| 100384551  | aroC |  | SAUSA300_1357 | 1524122 | Plus  |
| 100384535  |      |  | SAUSA300_0385 | 435779  | Minus |
| 120005475  | -    |  | SAUSA300_0071 | 78464   | Minus |
| 120005795  | epiC |  | SAUSA300_1765 | 1950985 | Minus |
| 1063922987 | -    |  | SAUSA300_2517 | 2720252 | Plus  |
| 100383002  |      |  | SAUSA300_0375 | 425681  | Plus  |
| 100337615  |      |  | SAUSA300_2001 | 2160337 | Plus  |
| 100337672  |      |  | SAUSA300_2093 | 2257083 | Minus |
| 100386943  |      |  | SAUSA300_2347 | 2524935 | Minus |
| 100384629  | argB |  | SAUSA300_0184 | 212992  | Minus |
| 100384549  | rumA |  | SAUSA300_1878 | 2038725 | Plus  |
| 100384816  | copA |  | SAUSA300_0078 | 86401   | Minus |
| 100384141  | argJ |  | SAUSA300_0185 | 214470  | Minus |
| 100386858  |      |  | SAUSA300_0267 | 319175  | Minus |
| 100337648  |      |  | SAUSA300_0319 | 371698  | Minus |
| 100333187  |      |  | SAUSA300_1456 | 1610990 | Minus |
| 100385307  | -    |  | SAUSA300_0882 | 969396  | Minus |
| 120005510  | -    |  | SAUSA300_2505 | 2711650 | Minus |
| 100384505  | fosB |  | SAUSA300_2280 | 2452626 | Plus  |
| 100362850  |      |  | SAUSA300_1482 | 1637125 | Minus |
| 100363036  |      |  | SAUSA300_2304 | 2477279 | Plus  |

|            |       |  |               |         |       |
|------------|-------|--|---------------|---------|-------|
| 100362118  | clpB  |  | SAUSA300_0877 | 962782  | Plus  |
| 100387042  |       |  | SAUSA300_0012 | 16577   | sense |
| 100382991  |       |  | SAUSA300_0047 | 59142   | Plus  |
| 100333153  |       |  | SAUSA300_1301 | 1432677 | Plus  |
| 120005474  | -     |  | SAUSA300_0585 | 659832  | Plus  |
| 120005696  | -     |  | SAUSA300_0916 | 1005585 | Minus |
| 100384008  | -     |  | SAUSA300_0544 | 609629  | Plus  |
| 100338067  |       |  | SAUSA300_0179 | 200804  | Minus |
| 100333182  |       |  | SAUSA300_1523 | 1675080 | Minus |
| 100337639  |       |  | SAUSA300_1771 | 1958742 | Plus  |
| 100362844  |       |  | SAUSA300_0863 | 943092  | Plus  |
| 100384525  |       |  | SAUSA300_2480 | 2678174 | Minus |
| 100384777  |       |  | SAUSA300_1485 | 1640481 | Minus |
| 100362938  |       |  | SAUSA300_0636 | 711515  | Plus  |
| 100385310  | -     |  | SAUSA300_1489 | 1643534 | Plus  |
| 100384665  | -     |  | SAUSA300_0252 | 303348  | Plus  |
| 100384701  | -     |  | SAUSA300_1868 | 2028343 | Plus  |
| 100337671  |       |  | SAUSA300_0095 | 103192  | Minus |
| 100337694  |       |  | SAUSA300_1294 | 1425675 | Plus  |
| 100337669  |       |  | SAUSA300_2313 | 2487478 | Plus  |
| 100337657  | ptsG  |  | SAUSA300_2476 | 2674120 | Minus |
| 120005822  | -     |  | SAUSA300_2507 | 2713612 | Plus  |
| 1063923003 | -     |  | SAUSA300_1302 | 1433581 | Plus  |
| 100384473  | gudB  |  | SAUSA300_0861 | 939592  | Minus |
| 100337611  |       |  | SAUSA300_0128 | 146392  | Minus |
| 100386880  |       |  | SAUSA300_0409 | 463143  | Plus  |
| 100333131  |       |  | SAUSA300_0351 | 401877  | Minus |
| 100383583  | -     |  | SAUSA300_0699 | 772863  | Plus  |
| 100337614  | qoxA  |  | SAUSA300_0963 | 1056329 | Minus |
| 100337608  |       |  | SAUSA300_2085 | 2248503 | Minus |
| 100384017  | -     |  | SAUSA300_1409 | 1574615 | Plus  |
| 100338000  |       |  | SAUSA300_0072 | 79974   | Minus |
| 100383646  | gltD  |  | SAUSA300_0446 | 501970  | Minus |
| 100382578  | panB  |  | SAUSA300_2534 | 2735674 | Plus  |
| 100337661  | ureF  |  | SAUSA300_2242 | 2408450 | Minus |
| 100337690  |       |  | SAUSA300_2503 | 2708375 | Minus |
| 100337698  |       |  | SAUSA300_2539 | 2742231 | Minus |
| 100384968  | -     |  | SAUSA300_1976 | 2131388 | Minus |
| 1063922979 | mtlA  |  | SAUSA300_2107 | 2276678 | Plus  |
| 1063922997 | -     |  | SAUSA300_2641 | 2865809 | Plus  |
| 100337610  |       |  | SAUSA300_0045 | 56558   | Minus |
| 100337628  | cap1B |  | SAUSA300_2597 | 2824200 | Plus  |
| 100384590  | pcrB  |  | SAUSA300_1887 | 2051867 | Minus |
| 100362251  |       |  | SAUSA300_2450 | 2646889 | Minus |
| 100338059  | argG  |  | SAUSA300_0864 | 944433  | Minus |
| 100384700  | -     |  | SAUSA300_1732 | 1917568 | Plus  |
| 100337643  | metB  |  | SAUSA300_0434 | 487561  | Plus  |
| 100333185  | isaB  |  | SAUSA300_2573 | 2786459 | Minus |
| 100337663  |       |  | SAUSA300_2587 | 2809503 | Minus |
| 100384456  | carA  |  | SAUSA300_1095 | 1198253 | Minus |
| 100384073  |       |  | SAUSA300_1518 | 1668656 | Plus  |
| 120005487  | lgt   |  | SAUSA300_0744 | 830410  | Plus  |
| 100383999  | -     |  | SAUSA300_1135 | 1243460 | Minus |
| 1063922986 | -     |  | SAUSA300_1909 | 2075664 | Minus |
| 100333157  |       |  | SAUSA300_1560 | 1710253 | Minus |
| 100337662  | brnQ  |  | SAUSA300_1300 | 1430836 | Minus |
| 100383599  | ipdC  |  | SAUSA300_0190 | 221035  | Plus  |
| 100387037  | -     |  | SAUSA300_1461 | 1615996 | Minus |
| 100386895  |       |  | SAUSA300_2389 | 2572838 | Plus  |
| 100385013  | -     |  | SAUSA300_0632 | 707218  | Plus  |
| 100383758  | potA  |  | SAUSA300_0999 | 1094626 | Plus  |
| 100384963  | budA  |  | SAUSA300_2165 | 2344050 | Plus  |
| 100362097  |       |  | SAUSA300_2338 | 2513302 | Plus  |
| 100333142  | uvrA  |  | SAUSA300_0742 | 826081  | Plus  |
| 120005716  | -     |  | SAUSA300_0023 | 29297   | Minus |
| 120005695  | -     |  | SAUSA300_1171 | 1290003 | Minus |
| 120005709  | -     |  | SAUSA300_1918 | 2084638 | Minus |
| 1063923064 | moaB  |  | SAUSA300_2226 | 2394105 | Minus |
| 100333176  |       |  | SAUSA300_1986 | 2144375 | Plus  |
| 100333107  |       |  | SAUSA300_2403 | 2587898 | Plus  |
| 100384747  |       |  | SAUSA300_1842 | 2003786 | Minus |

|            |      |  |               |         |       |
|------------|------|--|---------------|---------|-------|
| 100384818  | atpA |  | SAUSA300_2060 | 2224332 | Minus |
| 100385174  | -    |  | SAUSA300_1987 | 2145289 | Minus |
| 120005717  | -    |  | SAUSA300_1876 | 2036331 | Plus  |
| 120005736  | hisH |  | SAUSA300_2608 | 2835779 | Minus |
| 100383814  | -    |  | SAUSA300_1517 | 1667858 | Plus  |
| 100384592  | treR |  | SAUSA300_0450 | 507752  | Minus |
| 120005790  | -    |  | SAUSA300_0077 | 84977   | Minus |
| 100384140  | qoxC |  | SAUSA300_0961 | 1053369 | Plus  |
| 100338082  |      |  | SAUSA300_1496 | 1650004 | Minus |
| 100384752  |      |  | SAUSA300_0874 | 959775  | Plus  |
| 100384820  | gltA |  | SAUSA300_1641 | 1800430 | Plus  |
| 100335075  |      |  | SAUSA300_0740 | 822922  | Minus |
| 100337616  |      |  | SAUSA300_1802 | 1986089 | Minus |
| 100337664  |      |  | SAUSA300_1930 | 2101265 | Minus |
| 120005476  |      |  | SAUSA300_0079 | 88402   | Minus |
| 100337697  |      |  | SAUSA300_2258 | 2427485 | Minus |
| 100337649  |      |  | SAUSA300_2375 | 2554718 | Plus  |
| 100384474  | -    |  | SAUSA300_1172 | 1291162 | Plus  |
| 100383665  | -    |  | SAUSA300_0538 | 604068  | Plus  |
| 100333177  |      |  | SAUSA300_0181 | 205907  | Plus  |
| 100386918  |      |  | SAUSA300_2511 | 2716421 | sense |
| 100385191  |      |  | SAUSA300_0231 | 280284  | Plus  |
| 100338058  |      |  | SAUSA300_0205 | 244162  | Minus |
| 100338042  | proC |  | SAUSA300_1452 | 1604927 | Plus  |
| 100384806  |      |  | SAUSA300_0086 | 94436   | Plus  |
| 100333188  |      |  | SAUSA300_2421 | 2606937 | Plus  |
| 100384939  | nuc  |  | SAUSA300_1222 | 1339395 | Minus |
| 100384942  | rluB |  | SAUSA300_1443 | 1598324 | Minus |
| 100384463  | -    |  | SAUSA300_0007 | 10252   | Plus  |
| 100384044  | -    |  | SAUSA300_0395 | 446728  | Minus |
| 1063922985 | -    |  | SAUSA300_2043 | 2208092 | Plus  |
| 100383584  | -    |  | SAUSA300_0410 | 463651  | Minus |
| 100383597  | -    |  | SAUSA300_2146 | 2323397 | Minus |
| 100361690  |      |  | SAUSA300_0669 | 742594  | Minus |
| 120005779  | sak  |  | SAUSA300_1922 | 2088848 | Plus  |
| 120005528  | -    |  | SAUSA300_1203 | 1326128 | Minus |
| 100384609  | -    |  | SAUSA300_2052 | 2216999 | Minus |
| 100337660  |      |  | SAUSA300_2212 | 2379452 | Plus  |
| 1063923049 | -    |  | SAUSA300_0067 | 75868   | Plus  |
| 1063922974 | -    |  | SAUSA300_1274 | 1402745 | Minus |
| 1063922978 | -    |  | SAUSA300_1724 | 1906745 | Plus  |
| 1063922990 | -    |  | SAUSA300_1926 | 2091122 | Plus  |
| 100383683  | -    |  | SAUSA300_1570 | 1719756 | Plus  |
| 100384698  | -    |  | SAUSA300_0290 | 344870  | Plus  |
| 100385205  | -    |  | SAUSA300_0391 | 443034  | Minus |
| 100337696  |      |  | SAUSA300_1425 | 1584802 | Plus  |
| 100337645  | nrdD |  | SAUSA300_2551 | 2759046 | Plus  |
| 100363035  |      |  | SAUSA300_0701 | 775174  | Plus  |
| 100384794  |      |  | SAUSA300_0754 | 841011  | Plus  |
| 100384577  | -    |  | SAUSA300_0995 | 1091470 | Minus |
| 100384154  | sspA |  | SAUSA300_0951 | 1040189 | Minus |
| 100385008  | ilvB |  | SAUSA300_2007 | 2166812 | Minus |
| 1063922999 | lspA |  | SAUSA300_1089 | 1192030 | Plus  |
| 100337673  |      |  | SAUSA300_0600 | 674321  | Plus  |
| 100337652  |      |  | SAUSA300_1707 | 1890122 | Minus |
| 100333183  | galM |  | SAUSA300_2285 | 2458308 | Plus  |
| 100385308  | sek  |  | SAUSA300_0800 | 884001  | Plus  |
| 100384455  | -    |  | SAUSA300_1745 | 1927057 | Minus |
| 100333155  |      |  | SAUSA300_2640 | 2865301 | Plus  |
| 100338014  |      |  | SAUSA300_0261 | 314078  | Plus  |
| 100385010  | -    |  | SAUSA300_0271 | 323797  | Plus  |
| 100383979  | -    |  | SAUSA300_2413 | 2599291 | Minus |
| 100333179  |      |  | SAUSA300_0700 | 774045  | Plus  |
| 100382549  |      |  | SAUSA300_1379 | 1545522 | Plus  |
| 100383620  | est  |  | SAUSA300_0763 | 850800  | Plus  |
| 100383668  | oppB |  | SAUSA300_0887 | 974338  | Plus  |
| 1063923053 | -    |  | SAUSA300_1739 | 1923419 | Plus  |
| 100383983  | -    |  | SAUSA300_2618 | 2845552 | Minus |
| 100384130  | -    |  | SAUSA300_0617 | 689140  | Plus  |
| 100335096  |      |  | SAUSA300_1393 | 1563266 | Minus |
| 100384579  | -    |  | SAUSA300_1338 | 1503123 | Minus |



|            |        |  |               |         |       |
|------------|--------|--|---------------|---------|-------|
| 100384623  | manA   |  | SAUSA300_2096 | 2260328 | Minus |
| 100382618  | -      |  | SAUSA300_2076 | 2238769 | Plus  |
| 100384675  | mtlF   |  | SAUSA300_2105 | 2272748 | Plus  |
| 120005734  | atpG   |  | SAUSA300_2059 | 2222729 | Minus |
| 100337994  |        |  | SAUSA300_2351 | 2529589 | Minus |
| 100335101  |        |  | SAUSA300_2394 | 2578325 | Minus |
| 100385009  | icaB   |  | SAUSA300_2601 | 2828382 | Plus  |
| 100384041  | sirC   |  | SAUSA300_0115 | 131858  | Plus  |
| 100384004  | -      |  | SAUSA300_1419 | 1580239 | Plus  |
| 120005785  | -      |  | SAUSA300_1573 | 1721393 | Minus |
| 100387043  |        |  | SAUSA300_2579 | 2796626 | Minus |
| 100384128  | aroD   |  | SAUSA300_0787 | 873827  | Minus |
| 100337658  |        |  | SAUSA300_1174 | 1292833 | Plus  |
| 100384764  |        |  | SAUSA300_0400 | 452459  | Minus |
| 100383684  | -      |  | SAUSA300_1486 | 1641463 | Plus  |
| 100362102  |        |  | SAUSA300_1677 | 1846725 | Minus |
| 100384498  | -      |  | SAUSA300_0871 | 956155  | Minus |
| 100337656  |        |  | SAUSA300_2254 | 2420929 | Plus  |
| 100384169  | -      |  | SAUSA300_1706 | 1889395 | Plus  |
| 100384144  | lytM   |  | SAUSA300_0270 | 322581  | Plus  |
| 100383594  | asd    |  | SAUSA300_1287 | 1418224 | Minus |
| 100338068  |        |  | SAUSA300_0286 | 341365  | Plus  |
| 100338021  | sucA   |  | SAUSA300_1306 | 1439903 | Plus  |
| 100384956  | vraB   |  | SAUSA300_0560 | 634657  | Plus  |
| 100384630  | -      |  | SAUSA300_1669 | 1834229 | Minus |
| 100362131  |        |  | SAUSA300_0282 | 334702  | Plus  |
| 100384647  | hsdM   |  | SAUSA300_1752 | 1938353 | Plus  |
| 100386948  | -      |  | SAUSA300_1862 | 2023263 | Minus |
| 100385211  | pckA   |  | SAUSA300_1731 | 1915857 | Plus  |
| 120005686  | -      |  | SAUSA300_1697 | 1872039 | Plus  |
| 100384798  |        |  | SAUSA300_0429 | 483058  | Minus |
| 100384506  | -      |  | SAUSA300_2275 | 2446417 | Minus |
| 100337629  |        |  | SAUSA300_0828 | 908419  | Minus |
| 100338007  | gltS   |  | SAUSA300_2291 | 2463676 | Minus |
| 100362129  |        |  | SAUSA300_0950 | 1039108 | Minus |
| 100384559  | -      |  | SAUSA300_0987 | 1082782 | Minus |
| 100383764  | uhpT   |  | SAUSA300_0216 | 255168  | Plus  |
| 100384937  | -      |  | SAUSA300_1040 | 1136967 | Minus |
| 100387040  |        |  | SAUSA300_1058 | 1156911 | Minus |
| 120005494  | -      |  | SAUSA300_0300 | 351191  | Minus |
| 100362843  |        |  | SAUSA300_1785 | 1967946 | Minus |
| 100362949  |        |  | SAUSA300_0206 | 244976  | Minus |
| 100383685  | -      |  | SAUSA300_0591 | 664691  | Plus  |
| 120005711  | -      |  | SAUSA300_1742 | 1925202 | Minus |
| 100384503  | entB   |  | SAUSA300_0189 | 219054  | Plus  |
| 100383785  | arcB   |  | SAUSA300_0062 | 70528   | Plus  |
| 100383804  | ssaA   |  | SAUSA300_2253 | 2419944 | Plus  |
| 100384162  |        |  | SAUSA300_1716 | 1899947 | Plus  |
| 100383988  | cap5L  |  | SAUSA300_0163 | 186075  | Minus |
| 1063923020 | -      |  | SAUSA300_0958 | 1049797 | Minus |
| 1063923010 | -      |  | SAUSA300_2457 | 2655039 | Minus |
| 100333154  |        |  | SAUSA300_0139 | 158150  | Plus  |
| 100385014  | -      |  | SAUSA300_1033 | 1128579 | Minus |
| 100386928  |        |  | SAUSA300_0603 | 676840  | Minus |
| 100386898  | alsS   |  | SAUSA300_2166 | 2345220 | Plus  |
| 100385203  | -      |  | SAUSA300_2461 | 2657821 | Minus |
| 100384493  | -      |  | SAUSA300_1183 | 1302864 | Plus  |
| 100362851  |        |  | SAUSA300_1448 | 1601705 | Minus |
| 100384023  | deoB   |  | SAUSA300_0141 | 160435  | Plus  |
| 1063923001 | pyrF   |  | SAUSA300_1097 | 1202684 | Plus  |
| 1063923024 | -      |  | SAUSA300_2246 | 2411578 | Plus  |
| 100338079  |        |  | SAUSA300_0953 | 1043201 | Plus  |
| 100384249  | -      |  | SAUSA300_0098 | 108408  | Plus  |
| 100384457  | -      |  | SAUSA300_2516 | 2719163 | Plus  |
| 100385219  | phnC   |  | SAUSA300_0144 | 163414  | Minus |
| 100383662  | phoB   |  | SAUSA300_2561 | 2771415 | Minus |
| 120005755  |        |  | SAUSA300_1465 | 1619966 | Minus |
| 100384737  | opp-3C |  | SAUSA300_0075 | 83147   | Plus  |
| 100337625  |        |  | SAUSA300_0104 | 113854  | Minus |
| 100384796  | phoR   |  | SAUSA300_1638 | 1796913 | Plus  |
| 100362124  |        |  | SAUSA300_0712 | 791034  | Minus |

|            |       |  |               |         |       |
|------------|-------|--|---------------|---------|-------|
| 100384113  | -     |  | SAUSA300_2508 | 2714647 | Minus |
| 1063921680 | -     |  | SAUSA300_2604 | 2833301 | Plus  |
| 100338080  |       |  | SAUSA300_0042 | 53139   | Minus |
| 100384475  | -     |  | SAUSA300_0606 | 680278  | Minus |
| 120005549  | -     |  | SAUSA300_0813 | 892659  | Minus |
| 100337630  |       |  | SAUSA300_2354 | 2531282 | Minus |
| 100383607  | ald   |  | SAUSA300_1331 | 1493301 | Plus  |
| 100383682  | -     |  | SAUSA300_2260 | 2430228 | Plus  |
| 100384641  | -     |  | SAUSA300_1111 | 1217060 | Plus  |
| 100384748  | moaA  |  | SAUSA300_2219 | 2390175 | Plus  |
| 100337653  |       |  | SAUSA300_0935 | 1025497 | Minus |
| 1063923060 | -     |  | SAUSA300_2206 | 2371935 | Plus  |
| 100383586  | -     |  | SAUSA300_0810 | 890490  | Plus  |
| 120005486  | -     |  | SAUSA300_0587 | 661113  | Minus |
| 100384483  | -     |  | SAUSA300_0840 | 919252  | Minus |
| 100383987  | -     |  | SAUSA300_0240 | 290035  | Plus  |
| 100384725  | xerC  |  | SAUSA300_1145 | 1256892 | Plus  |
| 100383938  | -     |  | SAUSA300_1401 | 1567936 | Minus |
| 100384726  | -     |  | SAUSA300_2409 | 2594609 | Plus  |
| 100386907  |       |  | SAUSA300_0287 | 341961  | Minus |
| 100333118  | cap5P |  | SAUSA300_0167 | 189706  | Plus  |
| 100333178  |       |  | SAUSA300_0341 | 394565  | Plus  |
| 100333119  |       |  | SAUSA300_0678 | 753492  | Plus  |
| 100384082  | asnC  |  | SAUSA300_1345 | 1510469 | Plus  |
| 100384470  | -     |  | SAUSA300_2620 | 2847277 | Plus  |
| 100384751  | Cap5O |  | SAUSA300_0166 | 188298  | Plus  |
| 1063923018 | -     |  | SAUSA300_1187 | 1306124 | Plus  |
| 100384554  | -     |  | SAUSA300_0583 | 657384  | Minus |
| 100384712  | -     |  | SAUSA300_0458 | 518954  | Plus  |
| 100384734  | agrC  |  | SAUSA300_1991 | 2147768 | Plus  |
| 100384717  | -     |  | SAUSA300_2560 | 2770813 | Minus |
| 100384013  | arcA  |  | SAUSA300_0065 | 73785   | Plus  |
| 100337654  |       |  | SAUSA300_0217 | 257385  | Plus  |
| 100384508  | -     |  | SAUSA300_1654 | 1819401 | Plus  |
| 100384125  | -     |  | SAUSA300_0288 | 342870  | Minus |
| 1063923004 | -     |  | SAUSA300_0540 | 606911  | Plus  |
| 100385168  | -     |  | SAUSA300_1921 | 2087723 | Plus  |
| 120005501  | -     |  | SAUSA300_1952 | 2113331 | Minus |
| 120005712  | -     |  | SAUSA300_0090 | 98986   | Minus |
| 100337691  |       |  | SAUSA300_2126 | 2300633 | Minus |
| 100384961  | trpF  |  | SAUSA300_1266 | 1394290 | Plus  |
| 100383632  | -     |  | SAUSA300_0031 | 38764   | Minus |
| 100383615  | -     |  | SAUSA300_0518 | 579744  | Minus |
| 100383677  | -     |  | SAUSA300_0954 | 1043595 | Minus |
| 100382538  |       |  | SAUSA300_1173 | 1292213 | Minus |
| 100337642  |       |  | SAUSA300_2504 | 2710204 | Plus  |
| 1063922998 | -     |  | SAUSA300_0646 | 720467  | Plus  |
| 1063922977 | -     |  | SAUSA300_1118 | 1223761 | Plus  |
| 100384624  | -     |  | SAUSA300_0145 | 164069  | Plus  |
| 120005563  | -     |  | SAUSA300_2490 | 2693069 | Minus |
| 120005534  | -     |  | SAUSA300_1942 | 2109630 | Minus |
| 120005727  | scdA  |  | SAUSA300_0253 | 305258  | Plus  |
| 120005505  | -     |  | SAUSA300_1455 | 1609421 | Plus  |
| 100384835  | cap5G |  | SAUSA300_0158 | 180413  | Minus |
| 100384524  | arcB  |  | SAUSA300_2569 | 2781207 | Minus |
| 1063923011 | -     |  | SAUSA300_2368 | 2545743 | Plus  |
| 100384613  | -     |  | SAUSA300_0642 | 717084  | Minus |
| 100384732  | leuC  |  | SAUSA300_2012 | 2172471 | Plus  |
| 120005705  | tnp   |  | SAUSA300_2115 | 2291123 | Plus  |
| 100338057  | fmtB  |  | SAUSA300_2110 | 2284841 | Minus |
| 100337666  |       |  | SAUSA300_0210 | 248821  | Plus  |
| 100384532  |       |  | SAUSA300_2094 | 2258483 | Plus  |
| 100384619  | -     |  | SAUSA300_2495 | 2699367 | Plus  |
| 100384021  | rbsD  |  | SAUSA300_0263 | 315667  | Minus |
| 120005721  |       |  | SAUSA300_2080 | 2242633 | Plus  |
| 120005702  | opuCa |  | SAUSA300_2393 | 2576504 | Minus |
| 100384817  |       |  | SAUSA300_0359 | 412972  | Plus  |
| 100338077  |       |  | SAUSA300_0746 | 831959  | Minus |
| 100338008  |       |  | SAUSA300_1426 | 1585472 | Minus |
| 100383671  | rbsK  |  | SAUSA300_0262 | 315178  | Minus |
| 100385144  | lukD  |  | SAUSA300_1768 | 1956217 | Plus  |

|            |      |  |               |         |           |
|------------|------|--|---------------|---------|-----------|
| 100384761  |      |  | SAUSA300_0604 | 677618  | Plus      |
| 1063923058 | -    |  | SAUSA300_1968 | 2123023 | Plus      |
| 120005562  | -    |  | SAUSA300_0406 | 459425  | Minus     |
| 100385192  | nirD |  | SAUSA300_2345 | 2522036 | Minus     |
| 100384074  |      |  | SAUSA300_0131 | 149466  | Minus     |
| 100384486  | -    |  | SAUSA300_2496 | 2700135 | Minus     |
| 100362835  |      |  | SAUSA300_2540 | 2743100 | Minus     |
| 100384091  | cidA |  | SAUSA300_2479 | 2677272 | Plus      |
| 120005714  | pflA |  | SAUSA300_0221 | 263253  | Minus     |
| 100383773  | -    |  | SAUSA300_0723 | 803862  | Plus      |
| 100383623  | arcD |  | SAUSA300_0064 | 72982   | Plus      |
| 100383849  | -    |  | SAUSA300_0126 | 145088  | Plus      |
| 100383845  | -    |  | SAUSA300_2622 | 2848910 | Plus      |
| 100384604  | thiD |  | SAUSA300_0562 | 637545  | Minus     |
| 100338051  |      |  | SAUSA300_1508 | 1659241 | Minus     |
| 100337618  | sarU |  | SAUSA300_2438 | 2627336 | Plus      |
| 100384147  | potD |  | SAUSA300_1002 | 1097292 | Plus      |
| 100383982  | -    |  | SAUSA300_1424 | 1583773 | Plus      |
| 1063923040 | lacD |  | SAUSA300_2152 | 2330187 | Minus     |
| 100384031  | -    |  | SAUSA300_2350 | 2527845 | Minus     |
| 100386909  |      |  | SAUSA300_2276 | 2447656 | Minus     |
| 100385200  | -    |  | SAUSA300_1984 | 2142082 | Minus     |
| 100333166  |      |  | SAUSA300_0207 | 245276  | Plus      |
| 100362094  |      |  | SAUSA300_1402 | 1568593 | Minus     |
| 100383679  | -    |  | SAUSA300_2322 | 2496325 | Plus      |
| 100384170  | treC |  | SAUSA300_0449 | 506233  | Minus     |
| 100385001  | -    |  | SAUSA300_1284 | 1414036 | Minus     |
| 100383736  | -    |  | SAUSA300_2486 | 2685436 | Plus      |
| 100384834  | purF |  | SAUSA300_0972 | 1065236 | Plus      |
| 100384695  | -    |  | SAUSA300_0268 | 320572  | Minus     |
| 100384033  | -    |  | SAUSA300_2234 | 2400959 | Plus      |
| 100383596  | -    |  | SAUSA300_2131 | 2305415 | Minus     |
| 100384563  | chs  |  | SAUSA300_1920 | 2087202 | Plus      |
| 100384566  | alr  |  | SAUSA300_2027 | 2189185 | Minus     |
| 100384978  | nrdG |  | SAUSA300_2550 | 2757293 | Minus     |
| 100384058  | -    |  | SAUSA300_0658 | 734445  | Plus      |
| 120005498  | -    |  | SAUSA300_1919 | 2085991 | Plus      |
| 120005753  |      |  | SAUSA300_0443 | 495545  | Minus     |
| 100337607  | lacG |  | SAUSA300_2149 | 2327499 | Plus      |
| 100384696  | -    |  | SAUSA300_1957 | 2115350 | Minus     |
| 100383805  | norA |  | SAUSA300_0680 | 754627  | Minus     |
| 100385003  | -    |  | SAUSA300_0753 | 840293  | Minus     |
| 100384787  |      |  | SAUSA300_2349 | 2526831 | Minus     |
| 100386936  |      |  | SAUSA300_1232 | 1350703 | antisense |
| 100386934  |      |  | SAUSA300_2095 | 2259761 | Minus     |
| 120005687  | -    |  | SAUSA300_1789 | 1971167 | Minus     |
| 120005726  | -    |  | SAUSA300_2453 | 2649927 | Plus      |
| 100383638  | -    |  | SAUSA300_2556 | 2768075 | Plus      |
| 100384606  | hisA |  | SAUSA300_2607 | 2835335 | Minus     |
| 100333143  |      |  | SAUSA300_0464 | 523808  | Minus     |
| 100384103  | brnQ |  | SAUSA300_0188 | 218348  | Plus      |
| 100384778  | glvC |  | SAUSA300_2270 | 2441090 | Minus     |
| 100385206  | -    |  | SAUSA300_0666 | 740436  | Minus     |
| 120005713  | -    |  | SAUSA300_0398 | 450291  | Plus      |
| 120005692  | atpH |  | SAUSA300_2061 | 2225003 | Plus      |
| 100383782  | -    |  | SAUSA300_0675 | 749065  | Plus      |
| 100384187  | -    |  | SAUSA300_0670 | 742992  | Minus     |
| 100384254  | bioD |  | SAUSA300_2373 | 2550724 | Plus      |
| 100362088  | cinA |  | SAUSA300_1177 | 1295211 | Minus     |
| 100383672  | -    |  | SAUSA300_1698 | 1873634 | Plus      |
| 120005554  | -    |  | SAUSA300_1231 | 1349056 | Plus      |
| 100384735  | -    |  | SAUSA300_0653 | 728992  | Plus      |
| 100384728  | thrC |  | SAUSA300_1227 | 1345019 | Minus     |
| 120005749  |      |  | SAUSA300_0315 | 367024  | Minus     |
| 1063923051 | -    |  | SAUSA300_0370 | 422351  | Plus      |
| 100382990  | cysM |  | SAUSA300_0433 | 486453  | Plus      |
| 100384935  | purR |  | SAUSA300_0473 | 531716  | Plus      |
| 100383873  | -    |  | SAUSA300_0848 | 927895  | Minus     |
| 100384553  | arcC |  | SAUSA300_1063 | 1163307 | Plus      |
| 100338074  |      |  | SAUSA300_1392 | 1557097 | Minus     |
| 100384605  | -    |  | SAUSA300_1653 | 1818339 | Minus     |

|            |         |  |               |         |       |
|------------|---------|--|---------------|---------|-------|
| 100384087  | thiE    |  | SAUSA300_2047 | 2212794 | Plus  |
| 100384090  | -       |  | SAUSA300_2330 | 2506563 | Plus  |
| 120005479  |         |  | SAUSA300_0795 | 879017  | Plus  |
| 100385156  | oppC    |  | SAUSA300_0896 | 985041  | Plus  |
| 1063922980 | -       |  | SAUSA300_1899 | 2066004 | Plus  |
| 100383989  | -       |  | SAUSA300_2593 | 2821389 | Plus  |
| 100337993  |         |  | SAUSA300_2331 | 2507177 | Plus  |
| 100383846  | -       |  | SAUSA300_2129 | 2303582 | Minus |
| 1063922993 | hemA    |  | SAUSA300_1619 | 1772945 | Minus |
| 100382924  |         |  | SAUSA300_2262 | 2432848 | Minus |
| 100333106  |         |  | SAUSA300_2520 | 2723649 | Plus  |
| 100337631  | lacE    |  | SAUSA300_2150 | 2329367 | Plus  |
| 100385176  |         |  | SAUSA300_2598 | 2824834 | Minus |
| 1063922989 | luxS    |  | SAUSA300_2088 | 2251957 | Plus  |
| 100384964  | -       |  | SAUSA300_2050 | 2215221 | Plus  |
| 100384487  | -       |  | SAUSA300_0630 | 703830  | Plus  |
| 100384622  | -       |  | SAUSA300_0476 | 533573  | Minus |
| 100384121  | -       |  | SAUSA300_1925 | 2090794 | Plus  |
| 120005704  | -       |  | SAUSA300_0416 | 469174  | Minus |
| 120005509  | hisC    |  | SAUSA300_0708 | 786472  | Minus |
| 100337655  | icaA    |  | SAUSA300_2600 | 2826804 | Plus  |
| 100384167  | -       |  | SAUSA300_0578 | 652080  | Plus  |
| 100385005  | manA    |  | SAUSA300_2577 | 2791633 | Minus |
| 100383970  | -       |  | SAUSA300_0730 | 811014  | Plus  |
| 100362231  |         |  | SAUSA300_0548 | 620007  | Minus |
| 100386886  |         |  | SAUSA300_0683 | 757569  | Plus  |
| 100384088  | -       |  | SAUSA300_0552 | 627112  | Plus  |
| 1063923066 | msrA    |  | SAUSA300_1256 | 1384350 | Minus |
| 100383998  | opp-2F  |  | SAUSA300_1273 | 1402093 | Plus  |
| 100384830  |         |  | SAUSA300_0130 | 148502  | Minus |
| 100338047  |         |  | SAUSA300_1648 | 1810842 | Minus |
| 100383821  | -       |  | SAUSA300_1479 | 1632940 | Plus  |
| 100383946  | -       |  | SAUSA300_2169 | 2350353 | Plus  |
| 100362121  | pyrD    |  | SAUSA300_2526 | 2727862 | Minus |
| 100384171  | nirB    |  | SAUSA300_2346 | 2524394 | Minus |
| 100384550  |         |  | SAUSA300_1728 | 1912219 | Plus  |
| 1063923016 | sirA    |  | SAUSA300_0117 | 133509  | Minus |
| 100384781  |         |  | SAUSA300_1809 | 1992976 | Plus  |
| 100362926  | pknB    |  | SAUSA300_1113 | 1218285 | Plus  |
| 1063923012 | -       |  | SAUSA300_0602 | 676231  | Minus |
| 100382974  |         |  | SAUSA300_1637 | 1794598 | Minus |
| 100384627  | -       |  | SAUSA300_0651 | 726708  | Minus |
| 100383808  | fmt     |  | SAUSA300_0959 | 1051193 | Minus |
| 120005559  | -       |  | SAUSA300_0590 | 664319  | Minus |
| 1063923015 | -       |  | SAUSA300_2633 | 2859964 | Minus |
| 100384615  | arcC    |  | SAUSA300_2567 | 2778632 | Minus |
| 100383676  | -       |  | SAUSA300_2266 | 2436733 | Minus |
| 100383628  | -       |  | SAUSA300_2434 | 2622189 | Plus  |
| 100338084  | pepT    |  | SAUSA300_0727 | 808331  | Minus |
| 100384509  | -       |  | SAUSA300_1934 | 2102601 | Minus |
| 100383872  | -       |  | SAUSA300_0846 | 925564  | Minus |
| 100384763  | ampA    |  | SAUSA300_0845 | 923465  | Minus |
| 100383643  | -       |  | SAUSA300_1005 | 1101138 | Plus  |
| 100384172  | mreD    |  | SAUSA300_1604 | 1756947 | Minus |
| 100338055  | modC    |  | SAUSA300_2228 | 2396167 | Plus  |
| 100383011  |         |  | SAUSA300_2468 | 2664175 | Minus |
| 120005806  | lukS-PV |  | SAUSA300_1382 | 1547578 | Minus |
| 100384634  | ribD    |  | SAUSA300_1715 | 1897625 | Minus |
| 100384744  |         |  | SAUSA300_0381 | 430675  | Minus |
| 100384783  |         |  | SAUSA300_0390 | 441863  | Minus |
| 100384836  |         |  | SAUSA300_1286 | 1416969 | Plus  |
| 100383659  | -       |  | SAUSA300_1017 | 1114874 | Plus  |
| 100385004  | msrA    |  | SAUSA300_2594 | 2822091 | Minus |
| 100384238  | -       |  | SAUSA300_1090 | 1192511 | Plus  |
| 100333095  |         |  | SAUSA300_1936 | 2103959 | Minus |
| 1063922992 | -       |  | SAUSA300_0769 | 856546  | Plus  |
| 100383981  | -       |  | SAUSA300_1394 | 1563675 | Minus |
| 120005551  | hemX    |  | SAUSA300_1618 | 1771981 | Minus |
| 100384769  |         |  | SAUSA300_0030 | 37825   | Plus  |
| 120005703  | fhuB    |  | SAUSA300_0634 | 709493  | Minus |
| 100383809  | ptsI    |  | SAUSA300_0984 | 1078762 | Plus  |

|            |      |  |               |         |       |
|------------|------|--|---------------|---------|-------|
| 100385151  | srrA |  | SAUSA300_1442 | 1597478 | Plus  |
| 100384574  | -    |  | SAUSA300_2582 | 2801243 | Minus |
| 1063922988 | -    |  | SAUSA300_0085 | 93720   | Plus  |
| 100384184  | ctpA |  | SAUSA300_1313 | 1447506 | Plus  |
| 100338005  |      |  | SAUSA300_0316 | 367994  | Minus |
| 100338073  | estA |  | SAUSA300_2564 | 2774201 | Minus |
| 100384600  | ccpA |  | SAUSA300_1682 | 1853456 | Minus |
| 120005515  | hrcA |  | SAUSA300_1542 | 1692769 | Minus |
| 1063923000 | pdhB |  | SAUSA300_0994 | 1090353 | Minus |
| 100383640  | -    |  | SAUSA300_1385 | 1550609 | Minus |
| 100335083  | ccrB |  | SAUSA300_0037 | 47481   | Minus |
| 100337991  |      |  | SAUSA300_2037 | 2202533 | Minus |
| 100383825  | -    |  | SAUSA300_0175 | 197280  | Minus |
| 100384671  | -    |  | SAUSA300_0401 | 453485  | Minus |
| 100384976  | splB |  | SAUSA300_1757 | 1942702 | Minus |
| 100337995  | sucC |  | SAUSA300_1138 | 1247122 | Plus  |
| 100338013  | vraR |  | SAUSA300_1865 | 2026129 | Plus  |
| 100382542  | -    |  | SAUSA300_0422 | 473851  | Minus |
| 100385312  | -    |  | SAUSA300_0930 | 1020961 | Plus  |
| 1063923048 | -    |  | SAUSA300_1857 | 2019282 | Minus |
| 100361691  |      |  | SAUSA300_0659 | 735564  | Minus |
| 100384504  | -    |  | SAUSA300_2133 | 2306787 | Minus |
| 100384626  | -    |  | SAUSA300_0056 | 65927   | Plus  |
| 120005745  | speG |  | SAUSA300_0053 | 63351   | Plus  |
| 120005710  | -    |  | SAUSA300_1569 | 1718318 | Minus |
| 100382920  |      |  | SAUSA300_0330 | 383655  | Minus |
| 120005492  | gap  |  | SAUSA300_1633 | 1788881 | Plus  |
| 100337996  | hutH |  | SAUSA300_0008 | 11236   | Plus  |
| 100383639  | -    |  | SAUSA300_0586 | 660401  | Minus |
| 1063923057 | -    |  | SAUSA300_1218 | 1336958 | Plus  |
| 1063923017 | -    |  | SAUSA300_2557 | 2768553 | Minus |
| 100384805  | lysP |  | SAUSA300_1628 | 1782126 | Minus |
| 100384620  | -    |  | SAUSA300_0195 | 228012  | Plus  |
| 100385197  | pstA |  | SAUSA300_1281 | 1409950 | Plus  |
| 100338078  |      |  | SAUSA300_0403 | 455620  | Minus |
| 100382976  | ilvD |  | SAUSA300_2006 | 2165188 | Minus |
| 100384068  | -    |  | SAUSA300_0301 | 351853  | Plus  |
| 100383874  | gpsA |  | SAUSA300_1363 | 1530261 | Plus  |
| 100362120  |      |  | SAUSA300_1852 | 2015795 | Plus  |
| 100383614  | -    |  | SAUSA300_0724 | 804345  | Minus |
| 120005538  | -    |  | SAUSA300_0775 | 865428  | Plus  |
| 1063922996 | -    |  | SAUSA300_2525 | 2727043 | Minus |
| 100385167  | -    |  | SAUSA300_2326 | 2501453 | Minus |
| 100384987  | sarA |  | SAUSA300_0605 | 678755  | Minus |
| 100383828  | -    |  | SAUSA300_0173 | 195556  | Minus |
| 100386891  | mreC |  | SAUSA300_1605 | 1757464 | Minus |
| 100337992  | gltT |  | SAUSA300_2329 | 2505830 | Minus |
| 100384585  | -    |  | SAUSA300_0471 | 530461  | Minus |
| 100384552  | -    |  | SAUSA300_2459 | 2656598 | Minus |
| 100383781  | -    |  | SAUSA300_1354 | 1520966 | Plus  |
| 100384256  | -    |  | SAUSA300_2634 | 2860529 | Minus |
| 100384491  | -    |  | SAUSA300_0043 | 55091   | Minus |
| 100382552  |      |  | SAUSA300_0719 | 799241  | Plus  |
| 100382957  |      |  | SAUSA300_0943 | 1031533 | Plus  |
| 100384618  | -    |  | SAUSA300_1667 | 1832500 | Minus |
| 100384733  | -    |  | SAUSA300_1085 | 1185448 | Plus  |
| 100384790  |      |  | SAUSA300_0382 | 432612  | Minus |
| 100362134  |      |  | SAUSA300_2629 | 2855870 | Plus  |
| 100384638  | -    |  | SAUSA300_1463 | 1617489 | Minus |
| 100383762  | -    |  | SAUSA300_0417 | 469704  | Minus |
| 1063922984 | -    |  | SAUSA300_0979 | 1073386 | Minus |
| 1063923021 | -    |  | SAUSA300_2518 | 2721323 | Plus  |
| 100384797  |      |  | SAUSA300_0307 | 357418  | Plus  |
| 100384785  |      |  | SAUSA300_0665 | 739375  | Minus |
| 1063922972 | -    |  | SAUSA300_1197 | 1319250 | Plus  |
| 1063921694 | -    |  | SAUSA300_1428 | 1586248 | Minus |
| 100383656  | -    |  | SAUSA300_1884 | 2047081 | Minus |
| 120005700  | -    |  | SAUSA300_0844 | 922678  | Plus  |
| 100383966  | sbnC |  | SAUSA300_0120 | 136775  | Plus  |
| 100383784  | fdhD |  | SAUSA300_2231 | 2398109 | Minus |
| 100384640  | -    |  | SAUSA300_1749 | 1929945 | Minus |

|            |      |  |               |         |       |
|------------|------|--|---------------|---------|-------|
| 100384045  | arsR |  | SAUSA300_1717 | 1900916 | Plus  |
| 100383602  | narH |  | SAUSA300_2342 | 2516497 | Plus  |
| 100384762  |      |  | SAUSA300_0297 | 348891  | Plus  |
| 100384514  | -    |  | SAUSA300_0323 | 376964  | Minus |
| 1063923038 | -    |  | SAUSA300_1296 | 1426378 | Minus |
| 1063923063 | -    |  | SAUSA300_2537 | 2737982 | Minus |
| 100383600  | -    |  | SAUSA300_0866 | 946810  | Plus  |
| 100383627  | nsaS |  | SAUSA300_2558 | 2769852 | Minus |
| 100362143  |      |  | SAUSA300_2324 | 2498829 | Minus |
| 100384598  | -    |  | SAUSA300_0693 | 768888  | Plus  |
| 100384168  | -    |  | SAUSA300_2454 | 2650257 | Plus  |
| 100383829  | -    |  | SAUSA300_2378 | 2557699 | Minus |
| 1063923025 | -    |  | SAUSA300_1684 | 1856725 | Minus |
| 100382539  |      |  | SAUSA300_1940 | 2107620 | Minus |
| 100386915  |      |  | SAUSA300_0978 | 1072486 | Minus |
| 100383799  | mutY |  | SAUSA300_1849 | 2012179 | Minus |
| 100384194  | -    |  | SAUSA300_1549 | 1701545 | Minus |
| 100384718  | putP |  | SAUSA300_1883 | 2044913 | Minus |
| 1063923034 | -    |  | SAUSA300_0652 | 728010  | Minus |
| 1063923036 | -    |  | SAUSA300_0839 | 918885  | Minus |
| 100384573  | -    |  | SAUSA300_1870 | 2030469 | Minus |
| 100338056  | arcC |  | SAUSA300_0061 | 69656   | Minus |
| 100384124  | panD |  | SAUSA300_2532 | 2733987 | Plus  |
| 100383875  | -    |  | SAUSA300_0182 | 211007  | Minus |
| 100384642  | -    |  | SAUSA300_0237 | 286664  | Minus |
| 100384607  | gid  |  | SAUSA300_1144 | 1255966 | Minus |
| 100384772  | budA |  | SAUSA300_2536 | 2737232 | Plus  |
| 100383789  | -    |  | SAUSA300_0778 | 868141  | Minus |
| 100384621  | -    |  | SAUSA300_1861 | 2022971 | Minus |
| 100362099  |      |  | SAUSA300_2404 | 2589818 | Minus |
| 100384596  | argC |  | SAUSA300_0186 | 215089  | Plus  |
| 100383826  | -    |  | SAUSA300_0826 | 906919  | Plus  |
| 120005480  |      |  | SAUSA300_1950 | 2112577 | Plus  |
| 100383660  | potC |  | SAUSA300_1001 | 1096568 | Plus  |
| 1063923045 | -    |  | SAUSA300_0789 | 875362  | Minus |
| 1063922981 | -    |  | SAUSA300_1321 | 1452919 | Plus  |
| 100384951  | hisF |  | SAUSA300_2606 | 2834885 | Plus  |
| 100385198  | -    |  | SAUSA300_1260 | 1388493 | Minus |
| 100386912  |      |  | SAUSA300_0709 | 787645  | Plus  |
| 100382547  | clpC |  | SAUSA300_0510 | 568911  | Minus |
| 100384539  |      |  | SAUSA300_1945 | 2110898 | Plus  |
| 100384999  | -    |  | SAUSA300_1328 | 1489694 | Minus |
| 100384185  | -    |  | SAUSA300_0615 | 687331  | Minus |
| 100338070  |      |  | SAUSA300_0226 | 271668  | Plus  |
| 100384578  | acuA |  | SAUSA300_1680 | 1851576 | Plus  |
| 100384067  | -    |  | SAUSA300_0733 | 813773  | Minus |
| 120005697  | -    |  | SAUSA300_1908 | 2074808 | Minus |
| 100383633  | -    |  | SAUSA300_2315 | 2490274 | Plus  |
| 100384773  |      |  | SAUSA300_0102 | 111983  | Plus  |
| 100384246  | trkA |  | SAUSA300_0988 | 1083427 | Minus |
| 100384203  | -    |  | SAUSA300_1916 | 2080588 | Minus |
| 100384211  | -    |  | SAUSA300_2309 | 2481611 | Plus  |
| 1063922983 | rbfA |  | SAUSA300_1163 | 1279141 | Plus  |
| 1063923042 | -    |  | SAUSA300_2544 | 2748872 | Plus  |
| 100383008  | pbp4 |  | SAUSA300_0629 | 702395  | Minus |
| 100384730  | ung  |  | SAUSA300_0563 | 638411  | Plus  |
| 100384707  | -    |  | SAUSA300_2031 | 2192686 | Minus |
| 100383648  | -    |  | SAUSA300_1028 | 1123927 | Minus |
| 100337676  |      |  | SAUSA300_1895 | 2060490 | Plus  |
| 100384079  | -    |  | SAUSA300_0076 | 83911   | Minus |
| 100383853  | -    |  | SAUSA300_2412 | 2598596 | Plus  |
| 100383801  | hisC |  | SAUSA300_2610 | 2837763 | Plus  |
| 100384784  |      |  | SAUSA300_1962 | 2120091 | Minus |
| 1063923022 | -    |  | SAUSA300_0568 | 642314  | Minus |
| 1063923014 | -    |  | SAUSA300_0857 | 935048  | Minus |
| 100383824  | -    |  | SAUSA300_0305 | 354958  | Plus  |
| 100384811  |      |  | SAUSA300_0284 | 340483  | Minus |
| 100384755  | gcvT |  | SAUSA300_1498 | 1652521 | Plus  |
| 100384012  | -    |  | SAUSA300_0588 | 662135  | Minus |
| 100383629  | -    |  | SAUSA300_2471 | 2667862 | Minus |
| 100384157  | sbcC |  | SAUSA300_1243 | 1362274 | Plus  |

|            |        |  |               |         |       |
|------------|--------|--|---------------|---------|-------|
| 100383776  | -      |  | SAUSA300_1660 | 1825836 | Minus |
| 100338069  |        |  | SAUSA300_0817 | 897179  | Minus |
| 100383787  | atpD   |  | SAUSA300_2058 | 2222071 | Plus  |
| 100383816  | rarD   |  | SAUSA300_2628 | 2855410 | Plus  |
| 100383756  | -      |  | SAUSA300_1506 | 1658029 | Plus  |
| 100384802  |        |  | SAUSA300_0679 | 754175  | Plus  |
| 100384594  | -      |  | SAUSA300_1070 | 1169830 | Minus |
| 100383973  | -      |  | SAUSA300_2419 | 2605879 | Minus |
| 100384478  | -      |  | SAUSA300_1297 | 1426846 | Plus  |
| 1063923039 | -      |  | SAUSA300_1943 | 2109951 | Plus  |
| 100383675  | -      |  | SAUSA300_2552 | 2760448 | Plus  |
| 120005523  | -      |  | SAUSA300_1433 | 1587851 | Plus  |
| 100383005  |        |  | SAUSA300_0668 | 741450  | Minus |
| 100384601  | -      |  | SAUSA300_0526 | 585187  | Plus  |
| 100384576  | typA   |  | SAUSA300_1009 | 1104957 | Plus  |
| 100384608  | -      |  | SAUSA300_1721 | 1904284 | Minus |
| 100384988  | -      |  | SAUSA300_1061 | 1161079 | Minus |
| 100384975  | -      |  | SAUSA300_1650 | 1815414 | Plus  |
| 120005735  | -      |  | SAUSA300_0735 | 815924  | Minus |
| 100384197  | fruB   |  | SAUSA300_0684 | 758254  | Plus  |
| 100384191  | -      |  | SAUSA300_2174 | 2355147 | Minus |
| 100383661  | -      |  | SAUSA300_2635 | 2862163 | Plus  |
| 100385015  | -      |  | SAUSA300_1792 | 1975992 | Minus |
| 100384639  | -      |  | SAUSA300_0739 | 822273  | Minus |
| 100362133  |        |  | SAUSA300_2420 | 2606251 | Plus  |
| 100384966  | -      |  | SAUSA300_2168 | 2349539 | Minus |
| 120005497  | -      |  | SAUSA300_0688 | 764574  | Plus  |
| 100383838  | -      |  | SAUSA300_0027 | 34913   | Minus |
| 100384682  | -      |  | SAUSA300_0517 | 578965  | Minus |
| 100384118  | -      |  | SAUSA300_1312 | 1445698 | Minus |
| 100385142  | argR   |  | SAUSA300_0066 | 74980   | Minus |
| 100384960  | -      |  | SAUSA300_2273 | 2444336 | Minus |
| 100385016  | opp-1A |  | SAUSA300_2411 | 2597238 | Minus |
| 100384182  | -      |  | SAUSA300_0232 | 280742  | Minus |
| 100384247  | -      |  | SAUSA300_1332 | 1494902 | Plus  |
| 100383822  | -      |  | SAUSA300_1352 | 1519463 | Minus |
| 100385165  | -      |  | SAUSA300_1261 | 1389211 | Plus  |
| 100338050  |        |  | SAUSA300_0091 | 100206  | Plus  |
| 1063923065 | -      |  | SAUSA300_1395 | 1563886 | Minus |
| 100383837  | mgo    |  | SAUSA300_2312 | 2485154 | Minus |
| 100383009  | plc    |  | SAUSA300_0099 | 109229  | Plus  |
| 100387010  |        |  | SAUSA300_0256 | 308870  | Minus |
| 100384179  | -      |  | SAUSA300_1258 | 1386066 | Plus  |
| 120005722  | -      |  | SAUSA300_2284 | 2456965 | Plus  |
| 100384780  | ribE   |  | SAUSA300_1714 | 1897133 | Minus |
| 100384943  | -      |  | SAUSA300_1484 | 1640244 | Plus  |
| 100383645  | -      |  | SAUSA300_2282 | 2454691 | Plus  |
| 100382568  | hisB   |  | SAUSA300_2609 | 2836665 | Minus |
| 100384186  | -      |  | SAUSA300_0052 | 62650   | Plus  |
| 100384819  | trpE   |  | SAUSA300_1262 | 1390631 | Plus  |
| 100385002  | -      |  | SAUSA300_0773 | 862275  | Minus |
| 100384946  | -      |  | SAUSA300_1971 | 2125946 | Plus  |
| 100386890  |        |  | SAUSA300_2147 | 2324470 | Minus |
| 100383783  | -      |  | SAUSA300_1550 | 1702238 | Plus  |
| 1063923062 | potB   |  | SAUSA300_1000 | 1096084 | Minus |
| 1063923013 | sucD   |  | SAUSA300_1139 | 1248493 | Minus |
| 100385006  | ilvC   |  | SAUSA300_2009 | 2168974 | Plus  |
| 100383626  | hslO   |  | SAUSA300_0490 | 549889  | Minus |
| 100383813  | -      |  | SAUSA300_1435 | 1588468 | Minus |
| 100335084  |        |  | SAUSA300_1036 | 1130899 | Plus  |
| 100383644  | splC   |  | SAUSA300_1756 | 1941907 | Plus  |
| 100383650  | -      |  | SAUSA300_2102 | 2268891 | Minus |
| 100384148  |        |  | SAUSA300_2414 | 2600201 | Plus  |
| 100384599  | -      |  | SAUSA300_2337 | 2512097 | Plus  |
| 100384089  | -      |  | SAUSA300_0259 | 311116  | Minus |
| 1063923052 | -      |  | SAUSA300_2299 | 2471975 | Minus |
| 100384014  | -      |  | SAUSA300_2482 | 2679555 | Minus |
| 100384973  | -      |  | SAUSA300_1534 | 1684196 | Minus |
| 100384163  |        |  | SAUSA300_2211 | 2379117 | Minus |
| 100383969  | -      |  | SAUSA300_1859 | 2021506 | Plus  |
| 100384694  | deoC   |  | SAUSA300_2090 | 2254820 | Minus |

|            |       |  |               |         |           |
|------------|-------|--|---------------|---------|-----------|
| 100383674  | epiF  |  | SAUSA300_1762 | 1947636 | Plus      |
| 100384800  |       |  | SAUSA300_0313 | 364232  | Minus     |
| 100384799  |       |  | SAUSA300_0581 | 654859  | Minus     |
| 100387030  |       |  | SAUSA300_2230 | 2397389 | Plus      |
| 100384837  |       |  | SAUSA300_0599 | 673330  | Plus      |
| 100384779  |       |  | SAUSA300_1065 | 1166779 | Plus      |
| 100383673  | -     |  | SAUSA300_2021 | 2184021 | Plus      |
| 100384192  | -     |  | SAUSA300_0127 | 145928  | Minus     |
| 100362110  |       |  | SAUSA300_1031 | 1126502 | Minus     |
| 1063923009 | -     |  | SAUSA300_2358 | 2534397 | Plus      |
| 100335091  |       |  | SAUSA300_2455 | 2651631 | Minus     |
| 100383763  | -     |  | SAUSA300_0714 | 792953  | Plus      |
| 100383830  | -     |  | SAUSA300_0567 | 641901  | Minus     |
| 1063923041 | -     |  | SAUSA300_1217 | 1336126 | Plus      |
| 1063923028 | -     |  | SAUSA300_1966 | 2121765 | Minus     |
| 100383754  | -     |  | SAUSA300_2423 | 2608977 | Minus     |
| 100362116  |       |  | SAUSA300_2586 | 2808075 | Plus      |
| 100335094  |       |  | SAUSA300_1977 | 2133556 | Minus     |
| 100384178  | -     |  | SAUSA300_0208 | 246176  | Minus     |
| 100384188  | serA  |  | SAUSA300_1670 | 1834806 | Plus      |
| 100384250  | -     |  | SAUSA300_2583 | 2803158 | Minus     |
| 100362101  |       |  | SAUSA300_2167 | 2348422 | Plus      |
| 100384827  | srrB  |  | SAUSA300_1441 | 1596408 | Minus     |
| 100384998  | -     |  | SAUSA300_2336 | 2510809 | Plus      |
| 1063923023 | -     |  | SAUSA300_0334 | 387200  | Plus      |
| 100338045  |       |  | SAUSA300_1969 | 2123478 | Plus      |
| 100382537  |       |  | SAUSA300_0537 | 602375  | Minus     |
| 100384644  | -     |  | SAUSA300_1478 | 1632207 | Plus      |
| 100384026  | -     |  | SAUSA300_1342 | 1507867 | Minus     |
| 100384731  | -     |  | SAUSA300_0057 | 66503   | Plus      |
| 100382994  |       |  | SAUSA300_2086 | 2250160 | Minus     |
| 100384245  | -     |  | SAUSA300_0198 | 232790  | Plus      |
| 100384602  | trmB  |  | SAUSA300_1694 | 1868565 | Minus     |
| 1063923005 | -     |  | SAUSA300_1480 | 1633402 | Plus      |
| 100384754  |       |  | SAUSA300_1228 | 1345934 | Minus     |
| 100383836  | set7  |  | SAUSA300_0396 | 447554  | Minus     |
| 100384597  | hlgB  |  | SAUSA300_2367 | 2545158 | Plus      |
| 100338085  | oppF  |  | SAUSA300_0890 | 977338  | Minus     |
| 100384035  | -     |  | SAUSA300_2163 | 2342174 | Minus     |
| 100386917  |       |  | SAUSA300_0892 | 980646  | sense     |
| 100338002  | gutB  |  | SAUSA300_0242 | 291875  | Plus      |
| 100386938  |       |  | SAUSA300_1538 | 1687751 | antisense |
| 100384603  | -     |  | SAUSA300_2132 | 2305868 | Plus      |
| 100338064  | purQ  |  | SAUSA300_0970 | 1062106 | Plus      |
| 100382996  |       |  | SAUSA300_2445 | 2640725 | Plus      |
| 120005723  | rsbV  |  | SAUSA300_2024 | 2186352 | Minus     |
| 100384970  | -     |  | SAUSA300_0135 | 154256  | Minus     |
| 1063923056 | -     |  | SAUSA300_0345 | 397545  | Minus     |
| 100382972  | mtnN  |  | SAUSA300_1558 | 1707171 | Plus      |
| 100384253  | glpQ  |  | SAUSA300_0862 | 941664  | Minus     |
| 100384792  | galU  |  | SAUSA300_2439 | 2628763 | Plus      |
| 100383006  | kdpB  |  | SAUSA300_2033 | 2195388 | Plus      |
| 100383010  | bccT  |  | SAUSA300_2549 | 2756124 | Plus      |
| 100386888  | udk   |  | SAUSA300_1568 | 1717572 | Minus     |
| 100338010  |       |  | SAUSA300_1030 | 1125921 | Minus     |
| 100382922  |       |  | SAUSA300_0900 | 988619  | Minus     |
| 1063923019 | -     |  | SAUSA300_0937 | 1026573 | Plus      |
| 1063922982 | scpA  |  | SAUSA300_1445 | 1599285 | Plus      |
| 100383986  | -     |  | SAUSA300_2294 | 2466893 | Minus     |
| 120005701  | gltC  |  | SAUSA300_0444 | 496746  | Minus     |
| 120005724  | -     |  | SAUSA300_2491 | 2694348 | Minus     |
| 100362107  | cap5F |  | SAUSA300_0157 | 179509  | Minus     |
| 100383871  | -     |  | SAUSA300_0327 | 379579  | Plus      |
| 100383734  | -     |  | SAUSA300_0536 | 601182  | Minus     |
| 100382973  |       |  | SAUSA300_2348 | 2525923 | Minus     |
| 100338071  | rnr   |  | SAUSA300_0764 | 851566  | Minus     |
| 100383778  | rex   |  | SAUSA300_1999 | 2157348 | Plus      |
| 100387034  |       |  | SAUSA300_2237 | 2404785 | Plus      |
| 100382954  | purK  |  | SAUSA300_0967 | 1060180 | Plus      |
| 100385160  | ribH  |  | SAUSA300_1712 | 1895333 | Minus     |
| 120005484  | -     |  | SAUSA300_1911 | 2076966 | Plus      |



|            |      |  |               |         |       |
|------------|------|--|---------------|---------|-------|
| 100383007  |      |  | SAUSA300_0915 | 1004312 | Plus  |
| 100384994  | -    |  | SAUSA300_0358 | 411706  | Plus  |
| 100384982  | -    |  | SAUSA300_2547 | 2753121 | Minus |
| 100384175  | acnA |  | SAUSA300_1246 | 1367722 | Plus  |
| 100338062  |      |  | SAUSA300_0093 | 101309  | Minus |
| 100384801  | arcA |  | SAUSA300_2570 | 2782592 | Minus |
| 100382540  | sirB |  | SAUSA300_0116 | 133168  | Minus |
| 100384766  |      |  | SAUSA300_0101 | 111166  | Minus |
| 100382986  |      |  | SAUSA300_1609 | 1760679 | Plus  |
| 1063923030 | -    |  | SAUSA300_0982 | 1077950 | Plus  |
| 100383863  | -    |  | SAUSA300_2497 | 2701674 | Minus |
| 100382556  |      |  | SAUSA300_1081 | 1183118 | Plus  |
| 100384229  | -    |  | SAUSA300_0543 | 608656  | Plus  |
| 100384226  | lacA |  | SAUSA300_2155 | 2332674 | Minus |
| 100338061  |      |  | SAUSA300_2215 | 2386153 | Plus  |
| 100384803  | pflB |  | SAUSA300_0220 | 260755  | Plus  |
| 100384814  |      |  | SAUSA300_0660 | 736616  | Minus |
| 100384983  | -    |  | SAUSA300_2216 | 2386563 | Plus  |
| 100382967  |      |  | SAUSA300_1810 | 1993647 | Minus |
| 100384174  | -    |  | SAUSA300_1408 | 1574164 | Plus  |
| 100384959  | -    |  | SAUSA300_2355 | 2531813 | Minus |
| 100383957  | -    |  | SAUSA300_2529 | 2730675 | Minus |
| 100383820  | epiP |  | SAUSA300_1763 | 1948798 | Minus |
| 100383004  | oppB |  | SAUSA300_0895 | 984005  | Minus |
| 100384137  | pheA |  | SAUSA300_1896 | 2061745 | Minus |
| 1063923054 | -    |  | SAUSA300_1741 | 1924859 | Minus |
| 100384215  | recA |  | SAUSA300_1178 | 1296308 | Plus  |
| 100384990  | betB |  | SAUSA300_2546 | 2752739 | Plus  |
| 100384212  | -    |  | SAUSA300_1607 | 1759452 | Minus |
| 100384958  | -    |  | SAUSA300_0421 | 473468  | Plus  |
| 100383831  | -    |  | SAUSA300_2071 | 2233458 | Minus |
| 100385139  | radA |  | SAUSA300_0511 | 571834  | Minus |
| 100382965  |      |  | SAUSA300_1388 | 1552472 | Minus |
| 100384992  | -    |  | SAUSA300_0118 | 134622  | Plus  |
| 100384216  | -    |  | SAUSA300_0060 | 68162   | Plus  |
| 100382997  |      |  | SAUSA300_2255 | 2422938 | Plus  |
| 1063923026 | -    |  | SAUSA300_0619 | 692798  | Plus  |
| 100383823  | -    |  | SAUSA300_0785 | 872667  | Minus |
| 1063923043 | -    |  | SAUSA300_0841 | 919995  | Minus |
| 100382925  |      |  | SAUSA300_0339 | 392150  | Minus |
| 100383013  |      |  | SAUSA300_1056 | 1153917 | Plus  |
| 100382927  |      |  | SAUSA300_2320 | 2494360 | Plus  |
| 100383862  | -    |  | SAUSA300_2317 | 2491420 | Plus  |
| 100384997  | -    |  | SAUSA300_2617 | 2844962 | Plus  |
| 100382551  |      |  | SAUSA300_1981 | 2138743 | Minus |
| 120005499  | -    |  | SAUSA300_0035 | 42370   | Minus |
| 100383854  | -    |  | SAUSA300_0408 | 461406  | Plus  |
| 100382550  |      |  | SAUSA300_1483 | 1639778 | Minus |
| 100384202  | -    |  | SAUSA300_1353 | 1520030 | Plus  |
| 100362126  |      |  | SAUSA300_0314 | 366225  | Minus |
| 100384227  | bglA |  | SAUSA300_0260 | 311719  | Minus |
| 100382921  | glk  |  | SAUSA300_1507 | 1658741 | Plus  |
| 100338076  | icd  |  | SAUSA300_1640 | 1799416 | Plus  |
| 100338015  |      |  | SAUSA300_0201 | 236717  | Plus  |
| 100384232  | alr2 |  | SAUSA300_1292 | 1422985 | Plus  |
| 100384195  | -    |  | SAUSA300_1671 | 1837363 | Minus |
| 100382966  |      |  | SAUSA300_2100 | 2263697 | Minus |
| 100384181  | -    |  | SAUSA300_0575 | 649872  | Minus |
| 100384244  | -    |  | SAUSA300_2160 | 2337571 | Plus  |
| 100385019  | -    |  | SAUSA300_2637 | 2863359 | Minus |
| 100382968  |      |  | SAUSA300_0776 | 866223  | Minus |
| 100384214  | -    |  | SAUSA300_2624 | 2851317 | Plus  |
| 100383866  | -    |  | SAUSA300_0667 | 740939  | Minus |
| 100384258  | -    |  | SAUSA300_2451 | 2648463 | Minus |
| 100383865  | -    |  | SAUSA300_2416 | 2602412 | Minus |
| 100384826  |      |  | SAUSA300_2087 | 2251342 | Minus |
| 100384260  | -    |  | SAUSA300_2379 | 2558540 | Minus |
| 100382987  |      |  | SAUSA300_0664 | 738946  | Minus |
| 100362125  |      |  | SAUSA300_2162 | 2341305 | Plus  |
| 100383755  | -    |  | SAUSA300_2319 | 2493575 | Plus  |
| 120005481  |      |  | SAUSA300_1429 | 1586528 | Plus  |

|           |       |  |               |         |       |
|-----------|-------|--|---------------|---------|-------|
| 100382955 | qoxB  |  | SAUSA300_0962 | 1055038 | Minus |
| 100384243 | -     |  | SAUSA300_0576 | 651377  | Minus |
| 100382975 |       |  | SAUSA300_1376 | 1543254 | Minus |
| 100382995 |       |  | SAUSA300_0655 | 731871  | Plus  |
| 100338075 |       |  | SAUSA300_1793 | 1977639 | Plus  |
| 100384233 | -     |  | SAUSA300_0796 | 879505  | Minus |
| 100382564 |       |  | SAUSA300_2209 | 2376078 | Plus  |
| 100383864 | hsdS  |  | SAUSA300_1751 | 1936618 | Plus  |
| 100382969 |       |  | SAUSA300_1652 | 1817395 | Minus |
| 100382971 |       |  | SAUSA300_0577 | 651931  | Minus |
| 100382949 | Cap5N |  | SAUSA300_0165 | 187320  | Plus  |
| 100384575 | -     |  | SAUSA300_0022 | 28288   | Minus |
| 100362123 | recQ  |  | SAUSA300_0705 | 781428  | Minus |
| 100382545 |       |  | SAUSA300_1998 | 2156268 | Minus |
| 100382951 |       |  | SAUSA300_0894 | 983094  | Plus  |
| 100382557 | fhs   |  | SAUSA300_1678 | 1848786 | Minus |
| 100382970 |       |  | SAUSA300_1551 | 1702693 | Plus  |
| 100382961 | arsC  |  | SAUSA300_1719 | 1902503 | Plus  |
| 100384248 | vga   |  | SAUSA300_2000 | 2158006 | Plus  |
| 100384193 | -     |  | SAUSA300_2159 | 2337039 | Plus  |
| 100383770 | -     |  | SAUSA300_0901 | 988874  | Minus |
| 100382943 |       |  | SAUSA300_0274 | 327586  | Minus |
| 100382964 | fur   |  | SAUSA300_1514 | 1665124 | Plus  |
| 100384262 | ctaA  |  | SAUSA300_1015 | 1113596 | Minus |
| 100382978 |       |  | SAUSA300_1663 | 1828643 | Minus |
| 100384177 | rpsN  |  | SAUSA300_1234 | 1352209 | Plus  |
| 100362142 | pyc   |  | SAUSA300_1014 | 1109616 | Plus  |
| 100382919 |       |  | SAUSA300_0108 | 122258  | Minus |
| 100383775 | cap5M |  | SAUSA300_0164 | 186769  | Plus  |
| 100362140 |       |  | SAUSA300_1941 | 2108835 | Plus  |
| 100384204 | hisE  |  | SAUSA300_2605 | 2834108 | Plus  |
| 100384180 | -     |  | SAUSA300_0833 | 912091  | Minus |
| 100382928 | icaC  |  | SAUSA300_2602 | 2829225 | Minus |
| 100362928 |       |  | SAUSA300_2538 | 2739469 | Minus |
