# Supplementary material
Source: PubMed Central journal article supplement (PMC4255479)
Supplement: NIHMS60851-supplement-Supplementary_table_2.pdf [file NIHMS60851-supplement-Supplementary_table_2.pdf]

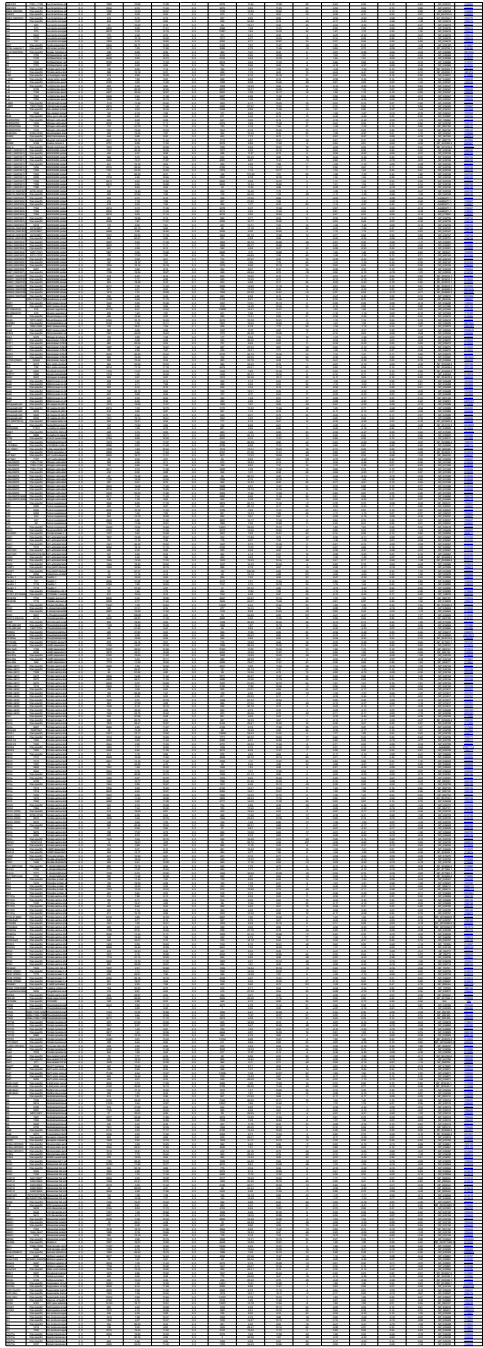

The image shows a small, dense grid of numbers, likely a portion of a larger table or spreadsheet. The grid is composed of many small cells, each containing a number. The numbers are arranged in a regular pattern, and the grid is bordered by a blue line on the right side. The numbers are too small to be legible, but they appear to be integers ranging from 1 to 1000, arranged in a roughly rectangular pattern.
